**Table S3 Lipid profile: Ions found in the lipid fraction of honeybee larvae using LC/MS**

*Transient exposure to low levels of insecticide affects metabolic network of honeybee larvae.  
Derecka et al. (2013)*

| m/z     | Elution time(Min) | ES mode | ID (where available)         | P value (T-Test) | Ratio of IMIDACLOPRID-EXPOSED/CONTROL (IE/E) |
|---------|-------------------|---------|------------------------------|------------------|----------------------------------------------|
| 850.788 | 18.083            | +       | TG + NH4?                    | 8.83E-05         | 3.50E-03                                     |
| 896.719 | 10.783            | +       | PC                           | 6.20E-05         | 8.30E-03                                     |
|         |                   |         | Glycerophosphocholines       |                  |                                              |
| 871.721 | 6.388             | +       | Diacylglycerophosphocholines | 3.97E-05         | 1.90E-02                                     |
| 850.787 | 7.248             | +       |                              | 6.48E-05         | 1.90E-02                                     |
|         |                   |         | PC(22:1(13E)/22:1            |                  |                                              |
| 897.742 | 7.641             | +       | Diacylglycerophosphocholines | 3.54E-05         | 2.20E-02                                     |
|         |                   |         | PC(23:0/23:0), or            |                  |                                              |
| 929.815 | 14.98             | +       | PC(20:0/26:0)                | 8.26E-06         | 2.40E-02                                     |
| 923.755 | 8.603             | +       | Diacylglycerophosphocholines | 4.38E-04         | 2.60E-02                                     |
| 860.783 | 12.213            | +       |                              | 5.70E-05         | 4.30E-02                                     |
| 924.757 | 13.765            | +       |                              | 3.33E-04         | 0.1                                          |
| 872.728 | 9.736             | +       |                              | 2.74E-04         | 0.1                                          |
| 892.808 | 10.251            | +       |                              | 1.47E-04         | 0.1                                          |
| 929.811 | 15.758            | +       |                              | 2.97E-04         | 0.1                                          |
| 899.768 | 6.408             | +       |                              | 3.19E-05         | 0.1                                          |
| 814.637 | 3.898             | +       |                              | 1.46E-05         | 0.1                                          |
| 824.778 | 16.956            | +       | PC                           | 4.27E-04         | 0.1                                          |
| 789.548 | 8.558             | -       |                              | 0.000722         | 0.1                                          |
| 591.514 | 9.563             | +       |                              | 8.51E-06         | 0.1                                          |
| 551.514 | 12.032            | +       |                              | 4.91E-05         | 0.1                                          |

|         |        |   |                    |          |     |
|---------|--------|---|--------------------|----------|-----|
| 871.725 | 7.006  | + |                    | 7.13E-05 | 0.1 |
| 897.753 | 7.987  | + |                    | 2.53E-04 | 0.1 |
| 802.7   | 13.704 | + |                    | 9.00E-05 | 0.1 |
| 898.744 | 13.551 | + | TG/SM              | 4.29E-04 | 0.1 |
| 924.759 | 15.083 | + |                    | 3.31E-04 | 0.1 |
| 801.698 | 13.89  | + |                    | 1.38E-05 | 0.1 |
| 812.627 | 18.907 | + | TG                 | 2.61E-04 | 0.1 |
| 895.737 | 8.44   | + |                    | 6.17E-04 | 0.1 |
| 591.513 | 18.254 | + |                    | 8.31E-06 | 0.1 |
| 593.515 | 11.409 | + |                    | 5.54E-06 | 0.2 |
| 866.788 | 11.941 | + | DG                 | 3.39E-04 | 0.2 |
| 802.697 | 14.331 | + |                    | 3.73E-05 | 0.2 |
| 552.519 | 12.264 | + |                    | 5.29E-08 | 0.2 |
| 873.742 | 10.723 | + |                    | 8.02E-05 | 0.2 |
| 621.541 | 11.409 | + |                    | 1.55E-06 | 0.2 |
| 788.544 | 8.192  | - | DG                 | 0.000952 | 0.2 |
| 603.536 | 11.631 | + | PS                 | 2.70E-04 | 0.2 |
| 361.194 | 0.543  | - |                    | 0.000166 | 0.2 |
| 811.595 | 3.072  | + |                    | 4.76E-07 | 0.2 |
| 812.543 | 6.843  | - |                    | 5.96E-05 | 0.3 |
| 551.504 | 13.702 | + |                    | 4.59E-05 | 0.3 |
| 604.54  | 10.188 | + | DG                 | 4.29E-04 | 0.3 |
| 604.53  | 9.333  | + |                    | 1.54E-04 | 0.3 |
| 866.786 | 11.353 | + |                    | 2.08E-04 | 0.3 |
| 859.786 | 14.318 | + |                    | 1.89E-04 | 0.3 |
| 772.584 | 3.268  | - |                    | 1.77E-07 | 0.3 |
| 604.541 | 13.609 | + | PE/PC              | 1.40E-05 | 0.3 |
| 878.512 | 18.628 | - |                    | 6.36E-07 | 0.3 |
| 621.544 | 12.031 | + |                    | 9.48E-06 | 0.3 |
| 603.535 | 13.657 | + | DG                 | 3.12E-05 | 0.3 |
| 577.52  | 10.144 | + | DG                 | 1.13E-07 | 0.3 |
| 551.505 | 15.478 | + |                    | 9.72E-04 | 0.3 |
| 793.572 | 2.903  | + | DG(P-14:/18:1(9Z)) | 2.02E-05 | 0.3 |
| 865.575 | 7.25   | - |                    | 0.000927 | 0.3 |

|         |        |   |                                   |          |     |
|---------|--------|---|-----------------------------------|----------|-----|
| 471.321 | 6.201  | + | PI                                | 5.02E-05 | 0.3 |
| 577.521 | 14.528 | + |                                   | 7.15E-06 | 0.3 |
| 793.573 | 2.232  | + |                                   | 8.39E-05 | 0.3 |
| 888.584 | 18.745 | + |                                   | 1.64E-04 | 0.3 |
| 876.573 | 3.67   | + |                                   | 7.17E-04 | 0.3 |
| 470.318 | 5.959  | + |                                   | 2.52E-05 | 0.4 |
| 824.568 | 5.186  | + |                                   | 2.32E-04 | 0.4 |
| 772.587 | 4.634  | - |                                   | 0.000136 | 0.4 |
| 746.561 | 13.295 | + | PE/PC                             | 2.53E-05 | 0.4 |
| 579.531 | 16.975 | + |                                   | 8.75E-05 | 0.4 |
| 464.359 | 6.145  | + |                                   | 1.21E-05 | 0.4 |
| 469.315 | 5.638  | + |                                   | 5.28E-05 | 0.4 |
| 793.068 | 0.766  | + | PC                                | 9.48E-04 | 0.4 |
| 798.543 | 1.121  | + |                                   | 2.00E-04 | 0.4 |
| 321.211 | 2.674  | + |                                   | 2.27E-07 | 0.4 |
| 339.221 | 2.558  | + |                                   | 5.57E-06 | 0.5 |
| 399.77  | 2.481  | + |                                   | 3.15E-04 | 0.5 |
| 331.187 | 0.794  | - |                                   | 0.000973 | 0.5 |
| 321.212 | 0.617  | + |                                   | 2.14E-04 | 0.5 |
| 171.138 | 5.449  | + |                                   | 8.69E-04 | 0.6 |
| 321.21  | 1.22   | + | DIOL                              | 2.84E-04 | 0.6 |
| 504.346 | 2.423  | + |                                   | 2.40E-04 | 0.6 |
| 478.331 | 2.996  | + |                                   | 3.26E-04 | 0.6 |
| 149.024 | 2.293  | + | PE(P-19:1(12Z)/:)                 | 1.42E-04 | 0.6 |
| 112.985 | 2.689  | - |                                   | 0.000171 | 0.7 |
| 478.33  | 2.461  | + |                                   | 6.18E-04 | 0.7 |
| 149.024 | 1.388  | + | PE(P-19:1(12Z)/:)                 | 2.68E-04 | 1.4 |
| 265.253 | 0.712  | + |                                   | 1.80E-04 | 1.6 |
| 233.154 | 1.937  | - |                                   | 0.000868 | 1.7 |
| 255.233 | 4.537  | - | LARGE ESTER/FFA C15H22O2          | 0.000596 | 1.8 |
| 177.104 | 0.748  | + | FFA C16H32O2                      | 9.72E-04 | 1.8 |
|         |        |   | C10H12N2O 3 candidates            |          |     |
| 107.05  | 0.732  | + | including serotonin, HT, cotinine | 3.12E-05 | 1.9 |
| 123.082 | 1.008  | + | BENZALDEHYDE                      | 5.82E-05 | 1.9 |

|         |        |   |                                |          |     |
|---------|--------|---|--------------------------------|----------|-----|
| 152.995 | 1.389  | - |                                | 7.35E-05 | 2.2 |
| 240.269 | 0.713  | + | Propanoyl phosphate            | 4.95E-04 | 2.2 |
| 109.102 | 3.052  | + |                                | 6.76E-04 | 2.2 |
| 121.03  | 1.045  | + |                                | 9.21E-06 | 2.3 |
| 173.097 | 0.752  | + |                                | 1.53E-05 | 2.3 |
| 273.168 | 0.731  | + | Glycylproline                  | 3.30E-04 | 2.3 |
| 466.33  | 2.285  | - |                                | 0.000163 | 2.4 |
| 149.06  | 1.028  | + | PE                             | 1.40E-05 | 2.4 |
| 195.102 | 1.045  | + | C9H8O2 7 CANDIDATES            | 1.37E-05 | 2.4 |
| 167.071 | 0.97   | + |                                | 1.32E-05 | 2.4 |
| 742.541 | 8.231  | - | C9H10O3 25 CANDIDATES          | 0.000425 | 2.4 |
| 123.118 | 3.052  | + | PE/PC                          | 2.76E-04 | 2.4 |
| 313.274 | 15.299 | + |                                | 3.61E-04 | 2.4 |
| 168.074 | 1.047  | + | C19H36O3 FFA ESTERS            | 1.13E-05 | 2.5 |
| 133.087 | 0.578  | + |                                | 6.89E-04 | 2.5 |
| 552.5   | 9.517  | - |                                | 0.00057  | 2.5 |
| 904.635 | 10.143 | - |                                | 0.000641 | 2.5 |
| 336.327 | 12.768 | - |                                | 9.55E-05 | 2.5 |
| 226.253 | 0.664  | + | Acyl amide                     | 8.81E-05 | 2.5 |
| 245.137 | 0.577  | + |                                | 9.37E-05 | 2.5 |
| 522.283 | 2.233  | - |                                | 0.000787 | 2.6 |
| 146.118 | 0.575  | + | PS                             | 4.34E-04 | 2.6 |
|         |        |   | Acetylcholine/ 8 CANDIDATES of |          |     |
| 231.121 | 0.578  | + | C7H15NO2                       | 7.76E-05 | 2.6 |
| 265.218 | 0.76   | - |                                | 0.00017  | 2.6 |
| 906.648 | 10.099 | - | FFA C17H30O2                   | 0.000188 | 2.7 |
| 299.223 | 0.81   | - |                                | 6.36E-05 | 2.7 |
| 435.252 | 1.602  | - | FFA/MG C17H32O4                | 6.11E-05 | 2.8 |
| 750.588 | 9.857  | + | glycerophosphate               | 9.43E-04 | 2.8 |
| 930.652 | 10.709 | - |                                | 0.000915 | 2.8 |
| 566.516 | 10.422 | - |                                | 0.000202 | 2.8 |
| 685.437 | 10.914 | + |                                | 6.67E-04 | 2.9 |
| 567.519 | 10.422 | - |                                | 0.000195 | 2.9 |
| 274.275 | 0.694  | + | 12:0 Cholesteryl ester         | 3.71E-05 | 2.9 |

|         |        |   |                                                  |          |     |
|---------|--------|---|--------------------------------------------------|----------|-----|
| 352.322 | 9.504  | - | C16 Sphinganine                                  | 0.000841 | 2.9 |
| 111.118 | 3.034  | + | Anandamide (20:l, n-9)                           | 8.68E-04 | 2.9 |
| 228.233 | 0.731  | + |                                                  | 1.16E-04 | 2.9 |
| 571.289 | 1.388  | - |                                                  | 5.01E-05 | 2.9 |
| 580.339 | 1.465  | - | PI                                               | 3.83E-06 | 2.9 |
| 597.305 | 0.926  | - |                                                  | 0.000468 | 2.9 |
| 506.495 | 10.428 | - | PI                                               | 9.15E-05 | 3   |
| 555.519 | 10.432 | - |                                                  | 0.000117 | 3.1 |
| 592.53  | 11.576 | - |                                                  | 0.000114 | 3.1 |
| 247.243 | 0.73   | + |                                                  | 3.41E-08 | 3.1 |
| 602.493 | 10.426 | - |                                                  | 0.000159 | 3.1 |
| 580.531 | 11.486 | - |                                                  | 4.30E-06 | 3.1 |
| 246.244 | 0.675  | + |                                                  | 7.64E-06 | 3.1 |
| 593.534 | 11.558 | - |                                                  | 0.000223 | 3.2 |
| 221.154 | 0.816  | - |                                                  | 2.44E-07 | 3.2 |
| 256.264 | 0.649  | + | Large ESTER C14H22O2                             | 3.69E-05 | 3.2 |
| 536.505 | 10.428 | - | FATTY AMIDE                                      | 2.40E-05 | 3.2 |
| 583.54  | 11.484 | - | N-Palmitoylsphingosine/<br>Ceramide (d18:1/16:0) | 3.25E-06 | 3.2 |
| 537.508 | 10.445 | - |                                                  | 2.34E-05 | 3.2 |
| 539.512 | 10.428 | - |                                                  | 3.20E-05 | 3.2 |
| 762.566 | 10.089 | - |                                                  | 0.000112 | 3.2 |
| 582.51  | 10.445 | - |                                                  | 2.14E-05 | 3.2 |
| 550.522 | 11.448 | - |                                                  | 2.48E-05 | 3.3 |
| 662.244 | 2.253  | - |                                                  | 0.000171 | 3.3 |
| 764.566 | 10.089 | - |                                                  | 0.000103 | 3.3 |
| 617.511 | 11.33  | - | PE/PC                                            | 3.08E-05 | 3.3 |
| 598.542 | 10.347 | - |                                                  | 8.80E-05 | 3.4 |
| 322.73  | 1.951  | + |                                                  | 1.26E-04 | 3.4 |
| 544.339 | 1.166  | + |                                                  | 8.30E-04 | 3.4 |
| 511.492 | 9.428  | - | PC/Lyso PC                                       | 7.95E-05 | 3.4 |
| 545.342 | 1.166  | + |                                                  | 8.35E-04 | 3.4 |
| 904.639 | 9.139  | - |                                                  | 0.000129 | 3.4 |
| 473.283 | 1.837  | - |                                                  | 9.14E-05 | 3.5 |

|          |        |   |                        |          |     |
|----------|--------|---|------------------------|----------|-----|
| 618.573  | 16.382 | + |                        | 9.25E-04 | 3.5 |
| 726.59   | 10.089 | - |                        | 0.000848 | 3.5 |
| 598.308  | 1.39   | - | Glucosylceramide       | 2.16E-05 | 3.5 |
| 599.314  | 1.541  | - |                        | 0.000129 | 3.5 |
| 564.537  | 10.089 | - |                        | 0.000291 | 3.5 |
| 285.243  | 2.021  | + | CERAMIDE               | 3.13E-04 | 3.5 |
| 294.03   | 0.68   | - | C17H32O3               | 2.83E-06 | 3.6 |
| 260.046  | 0.68   | - |                        | 4.62E-06 | 3.6 |
| 510.489  | 9.428  | - |                        | 8.06E-05 | 3.6 |
| 616.508  | 11.446 | - | Cer(d18:0/14:0)        | 1.08E-06 | 3.6 |
| 599.546  | 10.327 | - |                        | 7.28E-05 | 3.7 |
| 701.577  | 9.382  | - |                        | 0.000932 | 3.7 |
| 656.575  | 9.309  | - |                        | 0.000357 | 3.7 |
| 611.399  | 9.309  | - |                        | 2.50E-06 | 3.7 |
| 569.272  | 0.779  | - |                        | 0.00026  | 3.8 |
| 619.509  | 11.446 | - |                        | 7.91E-07 | 3.8 |
| 616.566  | 16.382 | + | PA (GLYCEROPHOSPATE)   | 7.66E-04 | 3.8 |
| 578.515  | 10.64  | - |                        | 0.000153 | 3.8 |
| 572.481  | 10.445 | - |                        | 2.82E-06 | 3.8 |
| 574.48   | 10.423 | - |                        | 3.26E-06 | 3.8 |
| 1175.777 | 9.324  | - |                        | 0.000868 | 3.9 |
| 554.515  | 10.64  | - |                        | 0.000243 | 3.9 |
| 1177.782 | 9.336  | - | CERAMIDE               | 0.000843 | 4   |
| 583.551  | 11.27  | - |                        | 3.43E-06 | 4   |
| 614.492  | 10.514 | - |                        | 0.000255 | 4   |
| 538.521  | 11.44  | - | DG                     | 7.54E-08 | 4.1 |
| 232.929  | 0.578  | + |                        | 5.47E-04 | 4.2 |
| 584.526  | 11.44  | - |                        | 1.49E-08 | 4.2 |
| 701.41   | 10.918 | + |                        | 6.49E-04 | 4.2 |
| 540.528  | 11.44  | - |                        | 9.62E-08 | 4.3 |
| 652.397  | 9.428  | - |                        | 0.000294 | 4.5 |
| 1344.945 | 11.205 | + |                        | 5.72E-04 | 4.5 |
| 560.503  | 10.819 | + |                        | 5.21E-04 | 4.5 |
| 561.506  | 10.786 | + | N-Palmitoylsphingosine | 5.20E-04 | 4.5 |

|          |        |   |                              |          |     |
|----------|--------|---|------------------------------|----------|-----|
| 381.353  | 9.076  | + |                              | 1.34E-04 | 4.6 |
| 1329.926 | 11.107 | + |                              | 9.65E-04 | 4.6 |
| 395.278  | 1.339  | + |                              | 1.54E-04 | 4.8 |
| 112.113  | 0.637  | + | C23H38O5 ESTERS              | 8.53E-04 | 4.9 |
| 562.508  | 10.716 | + |                              | 9.85E-05 | 5   |
| 128.021  | 0.617  | + |                              | 2.46E-04 | 5   |
| 131.003  | 2.135  | + |                              | 2.83E-06 | 5.2 |
| 639.43   | 10.107 | - |                              | 5.50E-05 | 5.2 |
| 590.55   | 14.493 | + |                              | 2.68E-04 | 5.3 |
| 562.518  | 10.943 | + |                              | 2.16E-04 | 5.4 |
| 117.092  | 0.676  | + |                              | 9.51E-05 | 5.5 |
| 574.497  | 11.398 | - |                              | 3.46E-08 | 5.5 |
| 619.427  | 10.633 | - |                              | 8.58E-05 | 5.5 |
| 439.416  | 10.608 | - |                              | 1.02E-06 | 5.7 |
| 120.082  | 1.083  | + | 28-hydroxy-octacosanoic acid | 6.23E-05 | 5.8 |
| 620.599  | 9.309  | - |                              | 0.000897 | 5.9 |
| 816.679  | 15.458 | + | CERAMIDE                     | 8.91E-04 | 5.9 |
| 149.013  | 2.166  | + | PE                           | 9.94E-06 | 6   |
| 590.541  | 13.203 | + |                              | 4.81E-04 | 6   |
| 576.496  | 11.398 | - |                              | 8.40E-06 | 6   |
| 324.12   | 8.958  | - |                              | 0.000131 | 6.1 |
| 633.508  | 10.066 | + |                              | 1.32E-05 | 6.2 |
| 655.571  | 17.153 | + |                              | 3.91E-04 | 6.3 |
| 1329.915 | 11.068 | + |                              | 5.75E-04 | 6.3 |
| 581.368  | 1.132  | - |                              | 0.000271 | 6.3 |
| 661.541  | 11.168 | + |                              | 1.67E-05 | 6.6 |
| 815.675  | 16.146 | + | TG Na+                       | 4.51E-04 | 6.6 |
| 110.01   | 0.617  | + |                              | 1.46E-04 | 6.7 |
| 693.564  | 15.018 | + |                              | 5.25E-07 | 7.3 |
| 663.466  | 15.418 | + | PC                           | 6.31E-06 | 7.4 |
| 381.301  | 17.312 | + |                              | 1.93E-04 | 7.5 |
| 625.394  | 1.132  | - | MG                           | 0.000277 | 7.5 |
| 157.994  | 0.626  | - |                              | 2.40E-06 | 7.9 |
| 667.461  | 10.106 | - |                              | 4.76E-05 | 8.1 |

|          |        |   |    |          |       |
|----------|--------|---|----|----------|-------|
| 654.568  | 17.312 | + |    | 1.03E-04 | 8.2   |
| 661.539  | 11.805 | + |    | 2.54E-05 | 8.3   |
| 1154.079 | 13.184 | + |    | 8.71E-04 | 8.3   |
| 693.565  | 16.914 | + |    | 1.02E-04 | 8.6   |
| 1155.08  | 13.186 | + | PC | 8.18E-04 | 8.9   |
| 234.963  | 0.617  | + |    | 2.06E-04 | 9.4   |
| 843.707  | 11.181 | + |    | 1.95E-05 | 9.5   |
| 844.709  | 13.013 | + |    | 8.93E-04 | 9.9   |
| 675.525  | 9.15   | - |    | 8.94E-05 | 10.4  |
| 617.513  | 15.359 | + |    | 2.27E-04 | 10.6  |
| 681.421  | 14.4   | + | DG | 1.38E-04 | 10.8  |
| 216.952  | 0.617  | + |    | 1.91E-04 | 11.1  |
| 278.053  | 0.626  | - |    | 6.78E-06 | 11.1  |
| 602.551  | 14.474 | + |    | 4.19E-04 | 13.9  |
| 841.682  | 11.132 | + |    | 4.74E-04 | 14    |
| 662.552  | 10.884 | + |    | 1.15E-04 | 14.6  |
| 867.697  | 14.506 | + |    | 8.87E-04 | 15.5  |
| 663.456  | 15.577 | + |    | 5.44E-07 | 15.9  |
| 666.536  | 12.649 | + |    | 1.90E-04 | 20.2  |
| 648.563  | 16.086 | + |    | 1.54E-04 | 22.6  |
| 843.709  | 11.701 | + |    | 2.08E-05 | 48.5  |
| 602.55   | 15.008 | + |    | 8.98E-04 | 57.8  |
| 813.659  | 16.842 | + |    | 7.05E-05 | 62.6  |
| 859.622  | 16.771 | + |    | 9.08E-05 | 69    |
| 843.706  | 12.913 | + |    | 8.39E-05 | 169.9 |
| 644.597  | 9.293  | + |    | 4.44E-04 | 195.9 |
| 860.624  | 16.781 | + |    | 3.42E-04 | 327.4 |
| 843.708  | 12.264 | + | PC | 7.19E-05 | 347.1 |
