# Supplementary material for: Transient Exposure to Low Levels of Insecticide Affects Metabolic Networks of Honeybee Larvae
Source: PLoS One. 2013 Jul 2;8(7):e68191. doi: 10.1371/journal.pone.0068191 (PMC3699529; doi:10.1371/journal.pone.0068191)
Supplement: Data S1 — microRNA data. (XLSX) [file pone.0068191.s008.xlsx]

## Sheet: sheet 1
DATA S1 microRNA data / sheet 1	Differential expression Tables showing the miRNA differential analysis of three controls and three samples. Results of genewise exact tests for differences in the means between two Groups of Negative-Binomial distributed counts. The functions accept two groups of count libraries, and a test is performed for each row of data. For each row, the test is conditional on the sum of counts for that row.…
	Transient exposure to low levels of insecticide affects metabolic network of honeybee larvae. Derecka et al. (2013)
miRNA	logFC	logCPM	PValue	FDR		C1	C2	C3	IE1	IE2	IE3
ame-mir-3767	-1.28909	6.55194	0.000249716	0.0409534		149.255	87.0522	145.428	56.7329	72.34	41.1524		E << C
ame-mir-3736	1.26258	4.14717	0.015303	0.897684		19.0354	1.54075	9.36656	21.984	16.9842	40.5472		E >> C
ame-mir-2944*	0.974121	4.14091	0.0164211	0.897684		6.92197	12.7112	12.3244	8.15535	39.6297	33.285
ame-mir-3743	-0.859659	4.16355	0.0244458	0.92168		17.3049	20.4149	29.0856	15.6015	10.0647	12.7088
ame-mir-3747a	-0.848153	4.63172	0.0281	0.92168		25.9574	41.6002	22.6769	25.8844	13.8389	12.1036
ame-mir-3720	0.854244	4.37138	0.038062	0.982313		12.9787	9.62967	20.705	29.0756	33.3393	21.1814
ame-mir-124*	-0.667023	4.5577	0.0562786	0.982313
ame-mir-3757	-0.987939	3.75417	0.073779	0.982313
ame-mir-3784	-0.72414	4.64733	0.0744309	0.982313
ame-mir-3792	-0.572002	8.40183	0.0842142	0.982313
ame-mir-9b	0.731198	3.63115	0.0900772	0.982313
ame-mir-14*	-0.699615	8.44568	0.0902436	0.982313
ame-mir-996*	0.61647	6.68758	0.0918937	0.982313
ame-mir-14	-0.496116	17.689	0.110454	0.982313
ame-mir-278	0.485572	7.47448	0.128512	0.982313
ame-mir-13a*	0.572757	7.8028	0.134226	0.982313
ame-mir-971	0.522339	4.50133	0.146894	0.982313
ame-mir-iab-4	0.54877	11.4079	0.151707	0.982313
ame-mir-282*	0.517717	6.19842	0.157746	0.982313
ame-mir-2944	0.512884	5.51522	0.162966	0.982313
ame-mir-3729	0.698328	3.23549	0.192107	0.982313
ame-mir-282	0.421865	7.45962	0.192961	0.982313
ame-mir-33*	0.434642	7.94948	0.195063	0.982313
ame-mir-283	0.429125	8.26846	0.201487	0.982313
ame-mir-92b-1*	-0.466847	3.83652	0.206086	0.982313
ame-mir-92b-2*	-0.466847	3.83652	0.206086	0.982313
ame-mir-989	-0.400271	7.56404	0.213433	0.982313
ame-mir-3761	-0.36815	12.7325	0.222233	0.982313
ame-let-7*	-0.372037	6.99158	0.224983	0.982313
ame-mir-125*	-0.416486	4.49555	0.264798	0.982313
ame-mir-3786	0.395345	7.06469	0.272713	0.982313
ame-mir-3732	-0.460634	9.19291	0.27327	0.982313
ame-mir-307*	0.387906	4.8166	0.284363	0.982313
ame-mir-137	0.409668	4.28089	0.284581	0.982313
ame-mir-3737	0.742966	8.47277	0.300882	0.982313
ame-mir-3049*	-0.341208	5.65494	0.30109	0.982313
ame-mir-11	0.35788	13.3065	0.302441	0.982313
ame-mir-3782	-0.504344	3.55291	0.307627	0.982313
ame-mir-133	0.31222	8.39088	0.318859	0.982313
ame-mir-3749	-0.376155	7.01865	0.321098	0.982313
ame-mir-279c*	-0.321773	7.86943	0.344369	0.982313
ame-mir-12*	0.394487	4.60369	0.349228	0.982313
ame-mir-306*	-0.315068	6.05122	0.350449	0.982313
ame-mir-92b-1	-0.277063	11.5201	0.35215	0.982313
ame-mir-92b-2	-0.276909	11.5201	0.352385	0.982313
ame-mir-281*	0.281083	6.36985	0.355271	0.982313
ame-mir-1175*	-0.264206	7.40717	0.363241	0.982313
ame-mir-993	-0.257402	11.6865	0.370481	0.982313
ame-mir-375*	0.303579	5.88562	0.378141	0.982313
ame-mir-3747b	-0.326866	5.91641	0.388314	0.982313
ame-mir-184*	-0.240973	11.0341	0.402612	0.982313
ame-mir-10-2*	0.263485	7.3191	0.403726	0.982313
ame-mir-3741	-0.301899	3.87962	0.406295	0.982313
ame-mir-10-1*	0.260672	7.32859	0.407867	0.982313
ame-mir-100*	-0.249449	7.36135	0.408478	0.982313
ame-mir-1175	0.231448	11.6158	0.416399	0.982313
ame-mir-279*	0.393058	9.40803	0.421704	0.982313
ame-mir-9a	0.264442	12.2842	0.428328	0.982313
ame-mir-3750	-0.392862	5.12891	0.470215	0.982313
ame-mir-7*	0.319781	3.87364	0.47071	0.982313
ame-mir-13b*	0.24935	6.98088	0.473795	0.982313
ame-mir-317	-0.293651	12.2331	0.484493	0.982313
ame-mir-13a	0.210181	8.39828	0.485467	0.982313
ame-mir-965*	0.341032	3.91489	0.487644	0.982313
ame-mir-125	-0.209626	11.8786	0.487725	0.982313
ame-mir-8*	0.214627	14.5663	0.497852	0.982313
ame-mir-3759*	0.381993	3.31798	0.500433	0.982313
ame-mir-3787	-0.173961	5.76082	0.505557	0.982313
ame-mir-87-1*	-0.373087	3.50994	0.508708	0.982313
ame-mir-3759	0.418791	4.19292	0.511957	0.982313
ame-mir-71	-0.236501	12.3624	0.515315	0.982313
ame-mir-750*	-0.209015	8.76383	0.515436	0.982313
ame-mir-750	-0.154073	17.9428	0.542237	0.982313
ame-mir-3770	0.184757	9.31308	0.562065	0.982313
ame-mir-275	-0.213564	6.98063	0.568025	0.982313
ame-mir-3718a*	-0.161006	7.085	0.569057	0.982313
ame-mir-275*	0.165274	6.10424	0.569897	0.982313
ame-mir-375	0.177949	10.0164	0.570478	0.982313
ame-bantam*	-0.179299	7.35741	0.580885	0.982313
ame-mir-3049	-0.198797	7.37853	0.587549	0.982313
ame-mir-100	-0.142429	12.5998	0.623536	0.982313
ame-mir-996	0.233837	7.85042	0.628183	0.982313
ame-mir-307	0.153382	13.8318	0.632717	0.982313
ame-bantam	0.126204	11.3611	0.63659	0.982313
ame-mir-124	0.0764397	7.23032	0.637328	0.982313
ame-mir-3755	-0.440746	5.81523	0.637646	0.982313
ame-mir-306	0.171054	10.1762	0.65867	0.982313
ame-mir-277	0.12413	10.2702	0.66146	0.982313
ame-mir-3747a*	-0.125127	3.68455	0.66748	0.982313
ame-mir-3785	0.162768	9.09313	0.668479	0.982313
ame-mir-3715	-0.109776	6.15152	0.67618	0.982313
ame-mir-9a*	0.107753	10.652	0.688049	0.982313
ame-mir-190	-0.107201	6.60517	0.694879	0.982313
ame-mir-3756*	-0.129717	5.03459	0.696805	0.982313
ame-mir-281	-0.114486	14.732	0.697222	0.982313
ame-mir-1-1*	-0.092708	8.80204	0.698128	0.982313
ame-mir-87-1	-0.113273	15.6642	0.699327	0.982313
ame-mir-87-2	-0.113262	15.6642	0.69934	0.982313
ame-mir-278*	0.166183	4.81153	0.699836	0.982313
ame-mir-980	0.108008	8.16136	0.703722	0.982313
ame-mir-2-3	0.111185	11.9656	0.706292	0.982313
ame-mir-1-2*	-0.0868835	8.79477	0.712705	0.982313
ame-mir-79	-0.101952	11.4328	0.71325	0.982313
ame-mir-193	0.177445	4.76261	0.723143	0.982313
ame-mir-971*	0.150736	3.11964	0.723733	0.982313
ame-mir-279b	-0.127595	4.62289	0.724227	0.982313
ame-mir-3716b	-0.0875026	6.40691	0.726858	0.982313
ame-mir-11*	-0.0944188	7.66	0.727438	0.982313
ame-mir-3724	0.122418	6.08647	0.740725	0.982313
ame-mir-1-1	-0.0890517	15.0982	0.750085	0.982313
ame-mir-31a	0.0670232	12.0688	0.753869	0.982313
ame-mir-263	-0.0657006	10.9681	0.760914	0.982313
ame-mir-279	0.140263	15.705	0.761511	0.982313
ame-mir-965	-0.104616	4.88561	0.767419	0.982313
ame-mir-263b	-0.0769593	7.3056	0.7695	0.982313
ame-mir-184	-0.102287	14.1369	0.770119	0.982313
ame-mir-79*	0.0685334	10.8111	0.770123	0.982313
ame-mir-927	0.165544	3.72534	0.777459	0.982313
ame-mir-279b*	-0.113748	4.07736	0.781781	0.982313
ame-mir-1-2	-0.0742394	15.0581	0.784036	0.982313
ame-mir-8	0.0643967	14.8662	0.784192	0.982313
ame-mir-2-2*	0.0567669	4.45323	0.786727	0.982313
ame-mir-3718a	-0.106711	12.6077	0.787654	0.982313
ame-mir-3477	0.201764	5.7524	0.790283	0.982313
ame-mir-3772	-0.0326851	6.18229	0.793194	0.982313
ame-mir-3798	-0.38307	5.54307	0.803155	0.982313
ame-mir-2-2	0.0762701	11.9446	0.80384	0.982313
ame-mir-2-1	0.07604	11.9446	0.804424	0.982313
ame-let-7	0.0569623	9.52592	0.804644	0.982313
ame-mir-3778	0.26329	5.26395	0.808806	0.982313
ame-mir-34*	-0.0744158	7.90888	0.810064	0.982313
ame-mir-3788	0.117992	5.97577	0.818403	0.982313
ame-mir-2788	-0.0360861	10.1621	0.828653	0.982313
ame-mir-3770*	0.122741	5.23938	0.839651	0.982313
ame-mir-133*	-0.0806299	3.40595	0.842395	0.982313
ame-mir-3727	-0.0953056	3.83541	0.843419	0.982313
ame-mir-316*	-0.0478466	9.43726	0.844563	0.982313
ame-mir-252*	0.0786132	6.13146	0.868511	0.982313
ame-mir-316	0.0890703	10.8512	0.876504	0.982313
ame-mir-276*	0.0564974	7.9352	0.87939	0.982313
ame-mir-2788*	0.0999049	4.38741	0.879525	0.982313
ame-mir-71*	0.0478183	11.3654	0.880056	0.982313
ame-mir-276	0.0232953	13.7621	0.881179	0.982313
ame-mir-13b	0.0553186	11.5492	0.891615	0.982313
ame-mir-305	0.0220427	11.6444	0.893216	0.982313
ame-mir-7	-0.038109	8.44254	0.894192	0.982313
ame-mir-29b	0.0650047	12.9115	0.894656	0.982313
ame-mir-210	-0.178172	4.86632	0.89826	0.982313
ame-mir-279c	-0.0737259	13.6407	0.907865	0.982313
ame-mir-10-1	0.0341501	10.6016	0.91063	0.982313
ame-mir-927*	0.112114	3.34373	0.921581	0.982313
ame-mir-3785*	0.0267935	5.10242	0.921774	0.982313
ame-mir-92a	-0.0271137	10.2363	0.925479	0.982313
ame-mir-34	-0.0159765	10.4197	0.931445	0.982313
ame-mir-10-2	0.0182437	10.5599	0.936247	0.982313
ame-mir-993*	0.02728	9.47957	0.945473	0.982313
ame-mir-33	0.0337518	10.8246	0.946373	0.982313
ame-mir-87-2*	-0.00245343	4.77506	0.946375	0.982313
ame-mir-3756	-0.0226792	5.95011	0.958408	0.986822
ame-mir-3791	0.0464069	5.30251	0.962753	0.986822
ame-mir-3783	-0.0282419	3.9311	0.969984	0.986916
ame-mir-252	0.0239648	14.766	0.975417	0.986916
ame-mir-305*	0.00782308	10.3148	0.980898	0.986916
ame-mir-12	0.0252591	12.8307	0.995196	0.995196

## Sheet: sheet 2
DATA S1 microRNA data / sheet 2	As in sheet 2, for the second set of sequencing (three controls, three replicates) . Columns in correspondence to the shaded (significant for uncorrected P Value) genes contain the normalized CPM (Counts per Millions) for each library
	Transient exposure to low levels of insecticide affects metabolic network of honeybee larvae. Derecka et al. (2013)
miRNA	logFC	logCPM	PValue	FDR			C1	C2	C3	IE1	IE2	IE3
ame-mir-3783*	2.2435	2.69459	0.000461633	0.0416487			6.54603	0	0	11.2443	11.653	11.1905		IE >> C
ame-mir-3767	-1.10131	6.75423	0.000507911	0.0416487			159.91	92.1372	168.373	76.6017	98.4029	39.7884		IE << C
ame-mir-3720	1.19949	4.59738	0.0024333	0.13302			16.8326	8.66247	16.9313	38.6522	40.138	27.3545
ame-mir-282	0.695403	7.28516	0.00843725	0.345927			95.385	103.162	126.044	129.309	266.724	252.408
ame-mir-3747b	-0.795044	5.8821	0.0107103	0.351299			82.2929	53.5498	74.3098	40.0578	42.7276	55.9525
ame-mir-971	0.966359	4.36044	0.0151014	0.412773			15.8975	11.025	12.2282	27.4079	22.0112	37.3016
ame-mir-92a*	1.12846	3.80309	0.0224965	0.488656			12.1569	6.29998	4.70315	5.62214	12.9477	48.4921
ame-mir-989	-0.582209	7.52088	0.0238369	0.488656			244.073	189.787	187.185	164.448	163.142	133.043
ame-mir-14	-0.516476	17.6831	0.0297994	0.508697			230059	246368	219471	190683	191036	166081
ame-mir-14*	-0.523923	8.83105	0.0330822	0.508697			474.119	533.136	507.94	431.499	354.768	382.964
ame-mir-3783	0.851505	4.01261	0.0351881	0.508697			10.2866	7.08747	15.0501	16.1637	25.8955	27.3545
ame-mir-279c*	-0.547454	8.01123	0.0373211	0.508697			266.517	303.974	281.248	197.478	270.608	213.863
ame-mir-307*	0.671344	4.79111	0.0451236	0.508697			17.7678	14.1749	27.2783	21.083	50.4962	44.762
ame-mir-3792	-0.511099	8.05812	0.045608	0.508697			335.718	268.536	275.605	226.291	284.85	190.238
ame-mir-965*	0.771614	4.13319	0.0465272	0.508697			8.41632	15.7499	11.2876	20.3803	23.3059	28.5979
ame-mir-124*	-0.710181	4.56116	0.0580528	0.569405
ame-mir-3747a	-0.693313	4.8018	0.0590237	0.569405
ame-mir-3761	-0.457669	12.8512	0.0644755	0.587443
ame-mir-282*	0.561774	6.22067	0.0704542	0.608131
ame-mir-3786*	-0.645899	4.29189	0.0846499	0.692977
ame-let-7*	-0.441869	6.91394	0.0887348	0.692977
ame-mir-927	0.658484	4.1874	0.102459	0.748322
ame-mir-3732	-0.482715	9.307	0.104948	0.748322
ame-mir-iab-4	0.380782	11.4312	0.120502	0.756772
ame-mir-3750	-0.881328	4.42016	0.121311	0.756772
ame-mir-3715	-0.435738	6.11963	0.122104	0.756772
ame-mir-283	0.493684	8.83721	0.12459	0.756772
ame-mir-3743	-0.625576	4.02628	0.134863	0.779153
ame-mir-92b-1	-0.340832	11.5078	0.141922	0.779153
ame-mir-92b-2	-0.340235	11.5076	0.142528	0.779153
ame-mir-275*	0.435898	5.92971	0.154891	0.819421
ame-mir-3049	-0.371629	7.46949	0.169521	0.868793
ame-mir-3784	-0.61171	4.04167	0.175896	0.874149
ame-mir-281*	0.337224	6.80789	0.190097	0.899101
ame-mir-3722	-0.560762	3.50752	0.192682	0.899101
ame-mir-278	0.319596	7.6385	0.197364	0.899101
ame-mir-10-1*	0.332466	7.31544	0.214589	0.927917
ame-mir-3787	-0.287403	8.09257	0.219108	0.927917
ame-mir-10-2*	0.329861	7.31245	0.220663	0.927917
ame-mir-1175*	-0.316623	7.55299	0.229096	0.934495
ame-mir-993	-0.25927	11.6411	0.241414	0.934495
ame-mir-34*	-0.289421	7.87412	0.25355	0.934495
ame-mir-3756*	0.361738	5.05783	0.274085	0.934495
ame-mir-125*	0.354988	4.55256	0.290955	0.934495
ame-mir-9c	0.519267	3.50931	0.313553	0.934495
ame-mir-3770*	0.329712	5.38982	0.313688	0.934495
ame-mir-3737	0.759296	8.90629	0.319384	0.934495
ame-mir-210	0.27429	5.38395	0.32002	0.934495
ame-mir-125	-0.227095	11.9566	0.323038	0.934495
ame-mir-3786	0.323699	7.03481	0.327163	0.934495
ame-mir-750	-0.197524	17.8357	0.338561	0.934495
ame-mir-3727	-0.401746	4.09061	0.351395	0.934495
ame-mir-100	-0.202162	12.5533	0.355044	0.934495
ame-mir-133*	-0.36163	3.47858	0.359414	0.934495
ame-mir-3716b	-0.301764	8.12303	0.359546	0.934495
ame-mir-184*	-0.191079	11.0227	0.367925	0.934495
ame-mir-3770	0.230712	9.29411	0.368398	0.934495
ame-mir-33*	0.243298	8.03071	0.369095	0.934495
ame-mir-11*	-0.23525	7.62859	0.379365	0.934495
ame-mir-87-1	-0.193423	15.6834	0.388271	0.934495
ame-mir-87-2	-0.193389	15.6834	0.388336	0.934495
ame-mir-1-1*	-0.184907	8.76204	0.391068	0.934495
ame-mir-3718a*	-0.197852	7.15246	0.393052	0.934495
ame-mir-996*	0.253829	6.81716	0.393092	0.934495
ame-mir-1175	0.181624	11.5493	0.397845	0.934495
ame-mir-3791	0.281718	5.43053	0.400001	0.934495
ame-mir-9a	0.201771	12.4928	0.401652	0.934495
ame-mir-1-2*	-0.178587	8.75437	0.40412	0.934495
ame-mir-71	-0.241214	12.315	0.405455	0.934495
ame-mir-3741	0.375108	3.98847	0.409415	0.934495
ame-mir-993*	-0.177191	9.41923	0.413999	0.934495
ame-mir-13a*	0.231004	7.57763	0.415245	0.934495
ame-mir-133	0.195752	8.40333	0.415964	0.934495
ame-mir-3759*	-0.306044	3.35191	0.423347	0.938034
ame-bantam	0.157411	11.3625	0.434337	0.938034
ame-mir-316*	-0.162127	9.97579	0.443923	0.938034
ame-mir-137	0.257831	4.46322	0.445929	0.938034
ame-mir-3718a	-0.20287	12.5155	0.459047	0.938034
ame-mir-3749	-0.296416	7.56314	0.459672	0.938034
ame-mir-8	0.149513	14.8911	0.465397	0.938034
ame-mir-750*	-0.183767	8.75134	0.471938	0.938034
ame-mir-3724	-0.226308	7.61658	0.476592	0.938034
ame-mir-3756	0.205944	5.93233	0.4859	0.938034
ame-mir-306	0.192355	10.164	0.489098	0.938034
ame-mir-92a	-0.172787	10.1818	0.50019	0.938034
ame-mir-34	-0.167809	10.6802	0.511303	0.938034
ame-mir-79*	0.144702	10.8847	0.526747	0.938034
ame-mir-13a	0.127634	8.42753	0.52794	0.938034
ame-mir-184	-0.149485	14.6108	0.531147	0.938034
ame-mir-2944	0.327542	5.16794	0.53219	0.938034
ame-mir-375*	-0.592307	5.68922	0.534516	0.938034
ame-mir-317	-0.201295	12.4454	0.536224	0.938034
ame-mir-9a*	0.128079	10.7487	0.544021	0.938034
ame-mir-13b*	0.154062	7.13309	0.549199	0.938034
ame-mir-306*	-0.199549	5.98414	0.549899	0.938034
ame-mir-2796	0.140833	5.8444	0.550438	0.938034
ame-mir-3788	0.178607	5.29591	0.557533	0.938034
ame-mir-281	-0.13531	14.7617	0.566814	0.938034
ame-mir-277	0.124784	10.3524	0.567364	0.938034
ame-mir-3785	0.181095	9.08279	0.571972	0.938034
ame-mir-252*	-0.144439	6.436	0.577746	0.938122
ame-mir-263	-0.100031	10.9595	0.584813	0.940287
ame-mir-316	0.147968	10.9751	0.617235	0.958968
ame-mir-190	-0.135759	6.4985	0.6288	0.958968
ame-mir-8*	0.111785	14.5293	0.637142	0.958968
ame-mir-3759	0.339235	4.30461	0.646236	0.958968
ame-mir-279	0.166765	15.8573	0.654439	0.958968
ame-mir-3798	-0.584028	5.84043	0.659697	0.958968
ame-mir-3778	0.336315	4.0077	0.661487	0.958968
ame-mir-2788	-0.0815485	10.1213	0.662175	0.958968
ame-mir-275	-0.139488	6.96874	0.664236	0.958968
ame-mir-307	0.0938555	13.7947	0.683306	0.958968
ame-bantam*	-0.107561	7.31949	0.689022	0.958968
ame-mir-31a	0.0329897	12.469	0.693308	0.958968
ame-mir-1-1	-0.0902108	15.1729	0.695542	0.958968
ame-mir-263b	-0.0804936	7.19529	0.703526	0.958968
ame-mir-3785*	-0.103175	5.25577	0.705674	0.958968
ame-mir-3799	0.00350533	3.60844	0.706646	0.958968
ame-mir-278*	0.199695	4.92147	0.709848	0.958968
ame-mir-1-2	-0.0824857	15.14	0.720203	0.958968
ame-mir-279c	-0.143447	13.7393	0.72348	0.958968
ame-mir-29b	0.113479	12.7465	0.726831	0.958968
ame-mir-193	0.135096	4.96052	0.726967	0.958968
ame-mir-3747a*	-0.0517192	3.99412	0.727886	0.958968
ame-mir-33	0.1074	10.7193	0.733401	0.958968
ame-mir-980	0.041862	8.19211	0.742574	0.958968
ame-mir-87-2*	-0.0718357	4.90063	0.746729	0.958968
ame-mir-12*	-0.113368	4.26875	0.749598	0.958968
ame-mir-305*	-0.0561996	10.3501	0.754311	0.958968
ame-mir-12	0.093639	12.7335	0.760683	0.959631
ame-mir-3049*	-0.104471	5.79059	0.776125	0.971637
ame-mir-2788*	-0.0967588	4.97235	0.788484	0.977117
ame-mir-11	0.0590406	13.4012	0.792418	0.977117
ame-mir-3782	-0.157856	3.83027	0.813195	0.995253
ame-mir-79	-0.0514525	11.3611	0.830582	1
ame-mir-100*	-0.0247497	7.32565	0.836411	1
ame-mir-7	-0.0449399	8.47949	0.847108	1
ame-mir-3477	-0.05441	5.9566	0.855857	1
ame-mir-375	0.0455881	10.1635	0.863855	1
ame-mir-3772	0.0741992	5.85313	0.869648	1
ame-mir-3726	-0.0977767	3.75542	0.873943	1
ame-mir-92b-2*	0.062104	3.96309	0.879905	1
ame-mir-2-3	0.0201625	11.9458	0.885098	1
ame-mir-2-2*	0.0491359	4.32377	0.899956	1
ame-mir-965	-0.0787473	5.05624	0.900026	1
ame-mir-71*	0.0210228	11.2944	0.909233	1
ame-mir-279b	0.10754	4.70378	0.921185	1
ame-mir-276	-0.000926571	13.4854	0.922513	1
ame-mir-210*	0.0877704	3.43714	0.925741	1
ame-mir-276*	-0.0178692	7.86388	0.927578	1
ame-mir-87-1*	0.0417232	3.56942	0.927708	1
ame-mir-7*	-0.0700243	3.61134	0.93226	1
ame-mir-279*	0.0315695	9.74771	0.933809	1
ame-mir-13b	0.0140114	11.5332	0.962383	1
ame-mir-305	-0.0236083	11.5957	0.974737	1
ame-mir-252	0.00736719	14.7182	0.975777	1
ame-mir-124	-0.0865514	7.5122	0.981068	1
ame-mir-10-2	-0.0138621	10.4216	0.981335	1
ame-let-7	-0.0447911	9.60063	0.985533	1
ame-mir-2-2	-0.0111742	11.9268	0.992169	1
ame-mir-2-1	-0.011173	11.9269	0.992252	1
ame-mir-10-1	-0.00336836	10.4463	0.999232	1
ame-mir-92b-1*	0.00350934	3.96174	1	1
ame-mir-996	0.0424403	8.07382	1	1

## Sheet: sheet 3 
DATA S1 microRNA data / sheet 3	Table showing non normalized, non-filtered (ie initial) Count Per Millions of the microRNAs belonging to all six libraries (Control and Experiment (IE)) for the first technical replicate (ie first sequencing)
	Transient exposure to low levels of insecticide affects metabolic network of honeybee larvae. Derecka et al. (2013)
miRNA	C1	C2	C3	IE1	IE2	IE3
ame-bantam	2028.57	2319.98	2733.56	2299.1	3376.07	3225.62
ame-bantam*	157.907	139.438	199.656	143.25	206.326	142.823
ame-let-7	639.85	560.832	844.962	602.432	1020.31	824.258
ame-let-7*	122.865	137.897	149.372	121.621	116.373	108.328
ame-mir-1-1	38508.2	30372.7	33650.1	33827.3	34450.8	39207.3
ame-mir-1-1*	420.077	419.468	480.159	473.719	456.685	419.391
ame-mir-1-2	36710.7	29629.3	32929.4	33177.4	33523.6	38350.4
ame-mir-1-2*	415.751	419.083	475.23	471.946	455.427	418.786
ame-mir-10-1	1472.65	1447.53	1404.49	1477.54	2108.55	1456.67
ame-mir-10-1*	148.822	121.719	139.512	142.541	272.376	156.742
ame-mir-10-2	1433.71	1410.94	1372.45	1388.89	2064.52	1436.1
ame-mir-10-2*	148.39	122.104	136.062	141.832	271.747	154.927
ame-mir-100	5749.13	6161.83	6600.96	5983.9	6603.07	6091.76
ame-mir-100*	154.014	158.312	198.67	155.306	166.067	151.901
ame-mir-11	4377.28	9437.84	11488.3	10615.8	13208	12674.9
ame-mir-11*	200.305	169.867	227.262	197.856	217.649	202.131
ame-mir-1175	2600.5	2454.79	3011.1	2551.21	3367.9	5127.71
ame-mir-1175*	174.78	161.778	194.233	169.135	157.89	153.716
ame-mir-12	6478.53	6668.74	7475.99	7750.77	8355.58	7031.61
ame-mir-12*	22.0638	20.0297	17.7472	31.9122	27.6779	26.0228
ame-mir-124	80.0353	128.267	190.289	39.3584	321.441	182.16
ame-mir-124*	24.6595	26.9631	32.0435	24.8206	15.7261	13.314
ame-mir-125	3863.33	3285.26	4372.21	3430.21	3491.19	4128.55
ame-mir-125*	15.5744	31.9705	25.6348	23.0477	17.6132	18.7606
ame-mir-133	299.375	213.008	326.844	266.644	343.458	602.761
ame-mir-133*	9.08509	7.31855	15.2823	10.2828	15.7261	6.657
ame-mir-137	13.8439	12.7112	21.198	18.7928	32.7102	20.5762
ame-mir-13a	260.872	289.66	332.759	321.959	420.201	422.417
ame-mir-13a*	173.049	130.963	221.84	314.513	227.714	281.41
ame-mir-13b	2659.34	2285.31	3480.91	2962.52	3134.52	3583.28
ame-mir-13b*	109.021	85.5114	135.076	125.876	113.857	196.684
ame-mir-14	234323	248449	216907	186957	198345	165935
ame-mir-14*	362.538	459.142	423.96	371.6	65.4205	345.559
ame-mir-184	14453.5	19355.6	20051.8	21982.9	1990.92	28438.7
ame-mir-184*	2079.62	2365.43	2017.75	2212.23	1746.22	2002.55
ame-mir-190	89.553	89.3633	110.427	99.6371	112.599	82.3048
ame-mir-193	23.7943	22.3408	27.1137	32.2668	39.6297	18.1555
ame-mir-2-1	3383.11	3312.22	4206.08	3736.57	4967.55	4256.25
ame-mir-2-2	3381.82	3311.83	4206.57	3736.57	4967.55	4256.85
ame-mir-2-2*	13.8439	20.8001	25.6348	15.9561	27.0489	30.8643
ame-mir-2-3	3383.11	3311.83	4206.08	3736.21	4966.3	4637.51
ame-mir-210	21.1985	23.4964	41.4101	9.92825	45.2911	39.942
ame-mir-252	23837.1	28488.4	25941.9	29308.6	29324.7	30015.2
ame-mir-252*	78.7374	41.6002	75.4255	69.8523	71.0819	86.5411
ame-mir-263	1865.47	1940.57	2054.23	2162.59	2338.78	1627.33
ame-mir-263b	170.886	127.882	164.654	155.661	170.471	159.768
ame-mir-275	122.432	129.038	128.667	99.2825	164.18	116.8
ame-mir-275*	32.8794	92.4448	50.7766	51.7687	130.841	61.1234
ame-mir-276	12194.8	12169.6	14398.4	11624.9	17703.2	16124.5
ame-mir-276*	200.737	244.208	234.164	250.688	275.521	265.675
ame-mir-277	1268.02	736.862	1336.95	970.487	1846.87	1392.52
ame-mir-278	123.298	129.423	167.612	184.736	262.94	220.286
ame-mir-278*	26.39	21.1853	28.0997	30.1393	32.7102	30.8643
ame-mir-2788	1257.2	954.107	1105.25	1230.75	1086.36	1212.18
ame-mir-2788*	7.78722	19.2593	31.5505	20.5657	44.033	5.44664
ame-mir-279	51501.6	44971.3	49316.4	63421.3	58130.5	52725.9
ame-mir-279*	774.396	171.793	781.861	792.133	979.42	646.94
ame-mir-279b	25.0921	19.2593	29.0856	21.6294	31.4522	22.3917
ame-mir-279b*	14.2766	12.7112	23.6629	15.247	20.7584	15.7347
ame-mir-279c	10474.2	11483.6	14908.1	9791.38	12757	17935.2
ame-mir-279c*	223.234	285.038	218.882	198.565	256.65	211.209
ame-mir-281	24910.9	25867.6	29656.5	25804.6	28083.6	29023.3
ame-mir-281*	68.7871	68.178	71.4816	72.3344	102.534	120.431
ame-mir-282	167.425	97.4522	158.739	152.115	277.408	228.759
ame-mir-282*	80.4679	31.9705	58.6642	71.6252	106.308	101.065
ame-mir-283	136.276	379.409	188.317	223.386	607.027	361.899
ame-mir-2944	41.5318	29.6594	35.9873	53.1871	49.6944	67.1752
ame-mir-2944*	6.92197	12.7112	12.3244	8.15535	39.6297	33.285
ame-mir-29b	8257.05	6478.07	6639.41	8151.8	9004.12	7690.05
ame-mir-3049	114.213	198.371	189.796	147.505	219.536	131.325
ame-mir-3049*	65.7587	46.9928	46.8328	47.5138	40.2588	50.8353
ame-mir-305	2908.53	2672.04	3373.93	2668.22	4569.37	3250.43
ame-mir-305*	1270.18	1199.47	1103.78	1221.88	1470.07	1384.05
ame-mir-306	975.133	957.959	1193	1317.98	1304.64	1220.05
ame-mir-306*	77.4396	57.778	73.4535	55.6691	75.4852	57.4923
ame-mir-307	12238.9	11503.2	15602.7	14433.5	16947.1	17590.2
ame-mir-307*	23.3617	15.0223	31.5505	25.8844	37.1135	40.5472
ame-mir-316	1802.31	1632.81	1677.11	2127.48	1270.67	2506.06
ame-mir-316*	814.63	551.972	632.489	679.731	704.528	769.187
ame-mir-317	4931.04	3839.16	6121.79	2836.29	6828.26	4741
ame-mir-31a	1140.83	6047.43	4348.06	3324.55	4184.4	6971.09
ame-mir-33	1507.26	1732.95	1858.03	1864.03	2096.6	1851.25
ame-mir-33*	179.106	172.178	252.404	280.473	328.361	292.908
ame-mir-34	1518.51	743.41	1706.69	1249.54	1646.21	1442.75
ame-mir-34*	221.503	209.542	270.644	221.967	269.86	254.782
ame-mir-3477	9.95033	59.7039	76.9044	66.6611	108.195	7.26219
ame-mir-3715	77.0069	67.4077	66.0589	77.2985	86.1789	49.6249
ame-mir-3716b	99.5033	75.4966	73.4535	89.7088	96.8726	70.8063
ame-mir-3718a	6176.56	5612.94	6407.71	5127.59	6255.83	8004.14
ame-mir-3718a*	139.305	147.526	119.793	145.378	147.825	106.512
ame-mir-3720	12.9787	9.62967	20.705	29.0756	33.3393	21.1814
ame-mir-3724	47.1559	68.178	68.5238	65.952	122.663	40.5472
ame-mir-3727	15.1418	13.0963	13.3104	13.1195	10.6937	19.971
ame-mir-3729	6.05673	1.92593	13.8034	12.7649	12.5809	10.8933
ame-mir-3732	600.481	462.224	844.962	290.756	808.95	557.373
ame-mir-3736	19.0354	1.54075	9.36656	21.984	16.9842	40.5472
ame-mir-3737	448.198	182.193	181.415	845.32	197.52	208.183
ame-mir-3741	15.1418	15.4075	15.7753	15.247	13.8389	11.4985
ame-mir-3743	17.3049	20.4149	29.0856	15.6015	10.0647	12.7088
ame-mir-3747a	25.9574	41.6002	22.6769	25.8844	13.8389	12.1036
ame-mir-3747a*	12.9787	12.326	13.3104	15.9561	13.2099	7.86737
ame-mir-3747b	82.631	52.0002	53.2415	45.0317	61.6462	66.57
ame-mir-3749	115.943	120.949	176.979	84.7447	133.986	151.296
ame-mir-375	1112.27	928.3	654.18	968.359	1446.8	1137.14
ame-mir-375*	49.3191	31.5853	70.0027	47.5138	106.308	61.1234
ame-mir-3750	28.5531	47.378	32.5365	19.1473	22.6456	59.3079
ame-mir-3755	19.0354	109.778	42.396	18.0836	135.244	18.1555
ame-mir-3756	72.6807	56.6224	44.8609	58.1512	64.1624	73.227
ame-mir-3756*	35.4751	37.7483	22.6769	34.7489	28.3069	34.4954
ame-mir-3757	12.9787	29.2742	5.42274	6.02787	13.8389	10.8933
ame-mir-3759	22.0638	6.93336	17.7472	30.1393	16.9842	14.5244
ame-mir-3759*	12.1135	3.85187	9.36656	13.4741	11.3228	9.68291
ame-mir-3761	6866.16	8373.96	6638.92	7299.04	6460.9	4517.08
ame-mir-3767	149.255	87.0522	145.428	56.7329	72.34	41.1524
ame-mir-3770	472.425	531.558	692.139	633.635	805.175	725.613
ame-mir-3770*	28.5531	31.5853	44.8609	45.7409	39.6297	36.3109
ame-mir-3772	72.6807	61.6299	78.3833	87.5814	71.0819	61.1234
ame-mir-3778	41.5318	9.24448	56.1994	59.9241	47.1782	16.9451
ame-mir-3782	10.8156	10.4	17.7472	5.67329	13.8389	13.314
ame-mir-3783	14.2766	14.2519	14.2963	10.6374	16.9842	22.3917
ame-mir-3784	26.39	45.452	15.2823	26.5935	15.7261	13.9192
ame-mir-3785	490.595	510.757	460.44	612.715	711.448	496.249
ame-mir-3785*	41.0992	37.3631	14.7893	31.5577	49.0654	31.4695
ame-mir-3786	127.624	98.993	102.539	161.689	150.341	165.215
ame-mir-3787	46.2907	67.7928	51.7626	73.0436	40.8878	37.5213
ame-mir-3788	70.085	32.3557	72.4676	66.3065	69.1947	70.2011
ame-mir-3791	51.4822	24.6519	34.5084	40.0676	49.0654	37.5213
ame-mir-3792	383.304	424.861	327.337	274.091	349.748	241.468
ame-mir-3798	6.05673	57.0076	80.8482	1.7729	110.712	36.9161
ame-mir-7	353.453	315.853	327.337	331.533	468.008	297.144
ame-mir-7*	12.1135	15.7927	8.38061	17.729	13.2099	19.971
ame-mir-71	4589.27	5563.25	5847.69	4068.46	6780.46	4893.5
ame-mir-71*	2456.43	2269.13	2621.16	2527.09	2719.35	3299.45
ame-mir-750	263837	254286	240716	279871	226110	230807
ame-mir-750*	373.354	475.706	469.314	395.712	435.298	452.071
ame-mir-79	2513.11	2616.57	3026.38	2707.22	2833.84	2886.11
ame-mir-79*	1459.24	1652.45	1815.63	1548.1	2323.06	2095.14
ame-mir-8	25616.1	24464	32301.3	25224.8	33333.6	40227.1
ame-mir-8*	20706.6	17032.6	26325.9	23488.1	30352.6	29640
ame-mir-87-1	50109.9	54796.7	47391.3	51024.8	54811.7	52082
ame-mir-87-1*	10.383	14.2519	10.8455	7.09161	9.43565	16.3399
ame-mir-87-2	50110.3	54793.6	47387.4	51024.1	54811	52077.1
ame-mir-87-2*	19.9007	23.1112	36.4803	29.7848	32.0812	23.6021
ame-mir-927	16.0071	5.00743	15.2823	13.8286	18.2423	12.1036
ame-mir-927*	14.7092	4.62224	8.87358	12.0557	14.468	6.05182
ame-mir-92a	1250.28	847.025	1378.36	1092.46	1268.78	1449.41
ame-mir-92b-1	3091.96	2916.25	3139.77	2738.78	2822.52	2808.05
ame-mir-92b-1*	14.7092	18.1038	14.2963	15.6015	10.6937	9.68291
ame-mir-92b-2	3091.96	2916.25	3139.28	2739.13	2822.52	2808.05
ame-mir-92b-2*	14.7092	18.1038	14.2963	15.6015	10.6937	9.68291
ame-mir-965	26.8226	30.8149	29.0856	29.4302	38.3716	22.3917
ame-mir-965*	11.6808	12.326	14.2963	19.8565	16.9842	15.1296
ame-mir-971	18.6028	14.2519	19.7191	21.984	35.2264	29.6539
ame-mir-971*	4.75886	7.31855	11.3385	6.38245	12.5809	11.4985
ame-mir-980	245.297	186.816	351.985	232.959	289.989	438.757
ame-mir-989	224.099	200.297	182.401	162.752	178.648	175.503
ame-mir-993	3094.55	3695.48	3448.37	3411.06	3184.85	2753.58
ame-mir-993*	593.992	664.447	750.804	703.133	871.225	721.377
ame-mir-996	224.531	95.9115	303.674	259.553	334.651	188.817
ame-mir-996*	89.553	42.7557	102.539	113.111	138.389	146.454
ame-mir-9a	5306.56	3329.17	4190.3	5045.68	6214.95	6109.92
ame-mir-9a*	1511.15	1004.57	1875.78	1260.53	2226.81	1961.4
ame-mir-9b	7.3546	5.7778	13.3104	9.21909	11.9518	30.2591
ame-mir-iab-4	2150.14	895.174	3349.78	2568.23	3656	4176.97
TOTAL	1e+06	1e+06	1e+06	1e+06	1e+06	1e+06

## Sheet: sheet 4
DATA S1 microRNA data / sheet 4	Table showing non-normalized, non-filtered (ie initial) Count Per Millions of the microRNAs belonging to all six libraries (Control and Experiment (IE)) for the second technical replicate (ie second sequencing)
	Transient exposure to low levels of insecticide affects metabolic network of honeybee larvae. Derecka et al. (2013)
miRNA	C1	C2	C3	IE1	IE2	IE3
ame-bantam	1838.5	2244.37	2806.84	2280.48	3488.12	3405.64
ame-bantam*	130.921	137.024	199.414	151.798	181.268	162.884
ame-let-7	636.835	663.86	879.489	587.514	1037.11	921.351
ame-let-7*	129.985	137.024	123.223	114.551	106.172	100.714
ame-mir-1-1	34895.9	36382.4	35125	35585.4	38190.7	41184.8
ame-mir-1-1*	444.195	392.961	474.078	460.313	366.421	446.376
ame-mir-1-2	33564.3	35611.4	34574.7	34939.5	37371.1	40370.3
ame-mir-1-2*	443.26	388.236	470.315	458.907	365.127	445.133
ame-mir-10-1	1365.31	1264.72	1258.56	1283.25	1873.54	1380.16
ame-mir-10-1*	113.153	123.637	153.323	139.148	302.977	151.693
ame-mir-10-2	1339.13	1245.03	1248.22	1236.87	1854.12	1362.75
ame-mir-10-2*	111.282	123.637	155.204	140.554	300.388	150.45
ame-mir-100	5981.2	5701.48	6428.27	5823.13	6196.79	5816.57
ame-mir-100*	162.716	135.449	158.967	168.664	185.153	151.693
ame-mir-11	9488	8897.93	11311.1	10437.5	12558	12722.3
ame-mir-11*	198.251	182.699	217.286	167.259	239.533	185.265
ame-mir-1175	2517.41	2349.1	2844.47	2388.01	3223.99	4916.36
ame-mir-1175*	193.575	165.374	226.692	158.123	221.407	162.884
ame-mir-12	5346.23	6211.78	7035.91	7486.59	8062.56	6918.21
ame-mir-12*	14.0272	22.0499	19.7532	20.3803	23.3059	14.9207
ame-mir-124	158.04	183.487	165.551	98.3875	306.862	206.402
ame-mir-124*	41.1465	13.3875	29.1595	18.272	16.8321	21.1376
ame-mir-125	4350.3	3270.48	4470.82	3653.69	4016.39	4045.99
ame-mir-125*	9.35147	21.2624	26.3376	22.4886	27.1903	37.3016
ame-mir-133	330.107	205.537	332.983	243.86	376.78	581.906
ame-mir-133*	14.0272	4.72498	17.872	12.6498	10.3582	6.21694
ame-mir-137	24.3138	17.3249	13.1688	14.0554	33.6641	34.8149
ame-mir-13a	235.657	329.174	343.33	305.001	440.223	440.159
ame-mir-13a*	185.159	143.324	165.551	203.1	246.007	213.863
ame-mir-13b	2625.89	2217.59	3479.39	2878.54	3145.01	3563.55
ame-mir-13b*	119.699	101.587	151.441	134.229	152.783	192.725
ame-mir-14	230059	246368	219471	190683	191036	166081
ame-mir-14*	474.119	533.136	507.94	431.499	354.768	382.964
ame-mir-184	23782.6	22991	27817.3	26684.1	16551.1	31052.4
ame-mir-184*	2078.83	2156.17	2034.58	2246.05	1793.26	2044.13
ame-mir-190	61.7197	103.95	99.7068	94.8737	91.929	87.0372
ame-mir-193	24.3138	23.6249	35.7439	30.9218	49.2014	26.1112
ame-mir-2-1	3463.78	3279.93	4196.15	3577.79	4826.92	4210.11
ame-mir-2-2	3463.78	3279.14	4196.15	3577.79	4825.63	4210.11
ame-mir-2-2*	17.7678	18.8999	17.872	17.5692	23.3059	26.1112
ame-mir-2-3	3463.78	3279.14	4197.09	3577.09	4825.63	4545.83
ame-mir-210	40.2113	26.7749	36.6846	26.7052	56.9701	72.1165
ame-mir-210*	16.8326	6.29998	6.58441	10.5415	10.3582	14.9207
ame-mir-252	22504.3	27178.9	25720.6	28534.5	29158.3	28632.7
ame-mir-252*	103.801	72.4497	79.0129	80.8183	102.287	80.8202
ame-mir-263	1845.04	1942.76	2043.05	2157.5	2184.29	1737.01
ame-mir-263b	159.91	106.312	160.848	145.473	160.552	147.963
ame-mir-275	126.245	123.637	113.816	104.712	159.257	126.826
ame-mir-275*	26.1841	68.5122	42.3284	39.355	129.477	74.6033
ame-mir-276	10147.3	10050.8	11661	9905.51	14378.5	13304.3
ame-mir-276*	200.121	240.974	213.523	236.833	283.556	223.81
ame-mir-277	1126.85	980.434	1385.55	1171.51	1882.6	1424.92
ame-mir-278	156.169	137.024	201.295	185.531	288.735	253.651
ame-mir-278*	42.0816	22.0499	15.0501	33.0301	36.2537	33.5715
ame-mir-2788	1268.06	866.247	1106.18	1140.59	1028.05	1252.09
ame-mir-2788*	23.3787	30.7124	37.6252	33.0301	53.0858	11.1905
ame-mir-279	56379.1	47379.8	55723.9	72343.6	65788.8	59023.6
ame-mir-279*	761.209	725.285	907.708	863.702	1130.34	809.446
ame-mir-2796	55.1737	51.1873	43.269	44.2744	77.6865	79.5769
ame-mir-279b	26.1841	14.1749	31.9814	30.9218	29.7798	23.6244
ame-mir-279c	11896.9	12012.5	15803.5	10291.3	13771.2	18849.8
ame-mir-279c*	266.517	303.974	281.248	197.478	270.608	213.863
ame-mir-281	25291	26564.6	29625.1	26211.1	28501.9	30459.3
ame-mir-281*	79.4875	83.4747	112.876	107.523	151.489	151.693
ame-mir-282	95.385	103.162	126.044	129.309	266.724	252.408
ame-mir-282*	73.8766	35.4374	58.3191	64.6546	129.477	101.958
ame-mir-283	180.483	506.361	338.627	420.255	968.492	415.292
ame-mir-2944	37.4059	19.6874	35.7439	52.7076	38.8432	29.8413
ame-mir-29b	6723.7	5893.63	5961.71	7460.58	8309.87	7015.2
ame-mir-3049	172.067	199.237	184.364	145.473	199.395	157.91
ame-mir-3049*	59.8494	40.9498	60.2003	48.491	42.7276	80.8202
ame-mir-305	2759.62	2651.5	3295.03	2733.77	4083.72	3225.35
ame-mir-305*	1361.57	1346.62	1011.18	1352.83	1487.7	1237.17
ame-mir-306	982.839	984.371	1050.68	1294.5	1359.51	1248.36
ame-mir-306*	63.59	62.2123	62.0816	52.7076	62.1492	77.0901
ame-mir-307	12201.8	11303.7	15045.4	13826.3	15947.7	17668.5
ame-mir-307*	17.7678	14.1749	27.2783	21.083	50.4962	44.762
ame-mir-316	1967.55	1704.93	1692.19	2185.61	2268.45	2294.05
ame-mir-316*	1199.79	879.634	924.64	1038.69	894.689	1053.15
ame-mir-317	5870.85	4172.95	6564.66	4006.48	7771.24	5467.18
ame-mir-31a	2026.46	7416.65	5561.01	3823.76	7567.96	8171.55
ame-mir-33	1363.44	1537.19	1680.91	1889.74	1895.55	1780.53
ame-mir-33*	198.251	208.687	269.02	290.243	337.936	282.249
ame-mir-34	1662.69	1390.72	1806.95	1404.83	2044.45	1585.32
ame-mir-34*	236.592	220.499	266.198	202.397	251.186	228.783
ame-mir-3477	45.8222	55.1248	79.0129	64.6546	115.235	17.4074
ame-mir-3715	85.0983	66.1498	75.2504	66.7629	77.6865	41.0318
ame-mir-3716b	412.4	218.137	241.742	263.538	437.634	94.4975
ame-mir-3718a	6487.11	4925.01	6072.71	4922.19	5302.1	7372.05
ame-mir-3718a*	119.699	156.712	154.263	159.528	145.015	109.418
ame-mir-3720	16.8326	8.66247	16.9313	38.6522	40.138	27.3545
ame-mir-3722	13.0921	8.66247	16.9313	9.83875	12.9477	6.21694
ame-mir-3724	248.749	156.712	194.71	188.342	322.399	69.6297
ame-mir-3726	12.1569	8.66247	18.8126	11.9471	7.76865	22.381
ame-mir-3727	21.5084	17.3249	15.0501	13.3526	7.76865	26.1112
ame-mir-3732	668.63	537.86	851.27	405.497	788.518	569.472
ame-mir-3737	590.078	211.837	307.586	1153.24	324.989	223.81
ame-mir-3741	12.1569	11.025	15.9907	19.6775	18.1268	18.6508
ame-mir-3743	26.1841	13.3875	15.9907	11.2443	12.9477	17.4074
ame-mir-3747a	21.5084	47.2498	27.2783	28.8135	25.8955	9.94711
ame-mir-3747a*	10.2866	17.3249	18.8126	24.5969	11.653	8.70372
ame-mir-3747b	82.2929	53.5498	74.3098	40.0578	42.7276	55.9525
ame-mir-3749	136.531	210.262	227.633	128.607	309.451	136.773
ame-mir-375	1226.91	997.759	912.411	1067.5	1494.17	1219.76
ame-mir-375*	66.3954	26.7749	73.3692	0	97.1081	57.1959
ame-mir-3750	7.48117	37.7999	29.1595	6.32491	33.6641	14.9207
ame-mir-3756	50.4979	54.3373	52.6753	61.1408	58.2649	92.0107
ame-mir-3756*	25.249	27.5624	28.2189	34.4356	36.2537	50.9789
ame-mir-3759	18.7029	11.8125	20.6939	33.7329	20.7164	9.94711
ame-mir-3759*	14.0272	7.08747	11.2876	11.9471	7.76865	7.46033
ame-mir-3761	7521.38	9231.04	7494	7891.38	6335.33	5000.91
ame-mir-3767	159.91	92.1372	168.373	76.6017	98.4029	39.7884
ame-mir-3770	490.017	482.736	656.56	675.36	805.35	702.514
ame-mir-3770*	26.1841	35.4374	42.3284	44.9771	64.7387	42.2752
ame-mir-3772	51.4331	50.3998	56.4378	61.1408	63.444	64.6562
ame-mir-3778	17.7678	3.14999	21.6345	25.2996	20.7164	7.46033
ame-mir-3782	15.8975	14.1749	11.2876	9.83875	18.1268	17.4074
ame-mir-3783	10.2866	7.08747	15.0501	16.1637	25.8955	27.3545
ame-mir-3783*	6.54603	0	0	11.2443	11.653	11.1905
ame-mir-3784	32.7301	22.8374	1.88126	26.0024	5.1791	2.48678
ame-mir-3785	492.822	506.361	428.927	622.652	705.652	507.302
ame-mir-3785*	37.4059	34.6499	39.5065	39.355	47.9067	29.8413
ame-mir-3786	138.402	84.2622	108.172	155.312	152.783	152.937
ame-mir-3786*	14.0272	21.2624	32.9221	20.3803	12.9477	12.4339
ame-mir-3787	345.069	255.937	248.326	282.513	247.302	236.244
ame-mir-3788	34.6004	37.7999	29.1595	35.8412	59.5596	42.2752
ame-mir-3791	44.887	28.3499	35.7439	41.4633	51.791	60.926
ame-mir-3792	335.718	268.536	275.605	226.291	284.85	190.238
ame-mir-3798	9.35147	78.7497	93.1224	1.40554	141.13	34.8149
ame-mir-3799	25.249	0.787497	11.2876	22.4886	9.06342	1.24339
ame-mir-7	327.301	322.874	366.846	342.951	498.488	297.17
ame-mir-7*	9.35147	18.8999	5.64378	13.3526	10.3582	13.6773
ame-mir-71	4135.22	5388.05	5801.81	4106.98	6447.98	4834.29
ame-mir-71*	2257.44	2202.63	2499.25	2384.49	2539.05	3245.24
ame-mir-750	254713	234675	218463	255769	206207	217613
ame-mir-750*	321.69	489.823	474.078	433.608	431.16	423.995
ame-mir-79	2051.71	2542.83	2923.48	2619.92	2810.96	2875.96
ame-mir-79*	1223.17	1828.57	1947.1	1863.74	2541.64	2077.7
ame-mir-8	26739.6	22746.9	30326.9	25655.9	37870.9	41675.9
ame-mir-8*	16076.1	19785.1	28071.2	23770.4	27229.1	28507.2
ame-mir-87-1	52726.4	55342.1	49227.9	51820.7	52271.4	52277
ame-mir-87-1*	11.2218	12.6	8.46567	11.2443	15.5373	12.4339
ame-mir-87-2	52726.4	55340.6	49227.9	51822.1	52271.4	52277
ame-mir-87-2*	28.0544	27.5624	31.0408	34.4356	28.485	27.3545
ame-mir-927	13.0921	14.1749	12.2282	23.8941	25.8955	21.1376
ame-mir-92a	1257.77	901.684	1296.19	1007.77	1191.19	1329.18
ame-mir-92a*	12.1569	6.29998	4.70315	5.62214	12.9477	48.4921
ame-mir-92b-1	3407.67	2718.44	3030.71	2656.46	2695.72	2816.27
ame-mir-92b-1*	14.9623	14.1749	14.1095	13.3526	18.1268	19.8942
ame-mir-92b-2	3404.87	2718.44	3030.71	2656.46	2697.02	2816.27
ame-mir-92b-2*	14.9623	13.3875	14.1095	13.3526	19.4216	19.8942
ame-mir-965	27.1193	38.5874	28.2189	28.8135	40.138	37.3016
ame-mir-965*	8.41632	15.7499	11.2876	20.3803	23.3059	28.5979
ame-mir-971	15.8975	11.025	12.2282	27.4079	22.0112	37.3016
ame-mir-980	286.155	226.012	280.308	214.344	332.757	438.916
ame-mir-989	244.073	189.787	187.185	164.448	163.142	133.043
ame-mir-993	3116.84	3585.47	3144.53	3473.08	3018.12	2593.71
ame-mir-993*	725.674	619.76	702.651	672.549	704.358	667.7
ame-mir-996	299.247	141.749	320.755	283.918	347	238.731
ame-mir-996*	87.9038	90.5622	110.994	125.795	107.466	157.91
ame-mir-9a	4968.43	4800.58	5226.14	5931.36	7474.74	6529.03
ame-mir-9a*	1086.64	1545.86	1942.4	1577.71	2395.33	1943.42
ame-mir-9c	4.67573	14.1749	6.58441	15.4609	16.8321	9.94711
ame-mir-iab-4	1731.89	1866.37	3072.1	2514.5	3697.88	4093.23
TOTAL	1e+06	1e+06	1e+06	1e+06	1000000	1000000

## Sheet: sheet 5
DATA S1 microRNA data / sheet 5	Table showing normalized, filtered (ie initial) Count Per Millions of the microRNAs belonging to all six libraries (Control and Experiment (IE)) for the first technical replicate (ie first sequencing)
	Transient exposure to low levels of insecticide affects metabolic network of honeybee larvae. Derecka et al. (2013)
miRNA	C1	C2	C3	IE1	IE2	IE3
ame-bantam	4689	6023	5545	6484	5367	5330
ame-bantam*	365	362	405	404	328	236
ame-let-7	1479	1456	1714	1699	1622	1362
ame-let-7*	284	358	303	343	185	179
ame-mir-1-1	89011	78852	68259	95401	54767	64786
ame-mir-1-1*	971	1089	974	1336	726	693
ame-mir-1-2	84856	76922	66797	93568	53293	63370
ame-mir-1-2*	961	1088	964	1331	724	692
ame-mir-10-1	3404	3758	2849	4167	3352	2407
ame-mir-10-1*	344	316	283	402	433	259
ame-mir-10-2	3314	3663	2784	3917	3282	2373
ame-mir-10-2*	343	317	276	400	432	256
ame-mir-100	13289	15997	13390	16876	10497	10066
ame-mir-100*	356	411	403	438	264	251
ame-mir-11	10118	24502	23304	29939	20997	20944
ame-mir-11*	463	441	461	558	346	334
ame-mir-1175	6011	6373	6108	7195	5354	8473
ame-mir-1175*	404	420	394	477	251	254
ame-mir-12	14975	17313	15165	21859	13283	11619
ame-mir-12*	51	52	36	90	44	43
ame-mir-124	185	333	386	111	511	301
ame-mir-124*	57	70	65	70	25	22
ame-mir-125	8930	8529	8869	9674	5550	6822
ame-mir-125*	36	83	52	65	28	31
ame-mir-133	692	553	663	752	546	996
ame-mir-133*	21	19	31	29	25	11
ame-mir-137	32	33	43	53	52	34
ame-mir-13a	603	752	675	908	668	698
ame-mir-13a*	400	340	450	887	362	465
ame-mir-13b	6147	5933	7061	8355	4983	5921
ame-mir-13b*	252	222	274	355	181	325
ame-mir-14	541634	645010	439995	527263	315312	274190
ame-mir-14*	838	1192	860	1048	104	571
ame-mir-184	33409	50250	40675	61997	3165	46992
ame-mir-184*	4807	6141	4093	6239	2776	3309
ame-mir-190	207	232	224	281	179	136
ame-mir-193	55	58	55	91	63	30
ame-mir-2-1	7820	8599	8532	10538	7897	7033
ame-mir-2-2	7817	8598	8533	10538	7897	7034
ame-mir-2-2*	32	54	52	45	43	51
ame-mir-2-3	7820	8598	8532	10537	7895	7663
ame-mir-210	49	61	84	28	72	66
ame-mir-252	55099	73960	52623	82657	46618	49597
ame-mir-252*	182	108	153	197	113	143
ame-mir-263	4312	5038	4167	6099	3718	2689
ame-mir-263b	395	332	334	439	271	264
ame-mir-275	283	335	261	280	261	193
ame-mir-275*	76	240	103	146	208	101
ame-mir-276	28188	31594	29207	32785	28143	26644
ame-mir-276*	464	634	475	707	438	439
ame-mir-277	2931	1913	2712	2737	2936	2301
ame-mir-278	285	336	340	521	418	364
ame-mir-278*	61	55	57	85	52	51
ame-mir-2788	2906	2477	2242	3471	1727	2003
ame-mir-2788*	18	50	64	58	70	9
ame-mir-279	119045	116752	100038	178863	92411	87124
ame-mir-279*	1790	446	1586	2234	1557	1069
ame-mir-279b	58	50	59	61	50	37
ame-mir-279b*	33	33	48	43	33	26
ame-mir-279c	24211	29813	30241	27614	20280	29636
ame-mir-279c*	516	740	444	560	408	349
ame-mir-281	57581	67156	60158	72775	44645	47958
ame-mir-281*	159	177	145	204	163	199
ame-mir-282	387	253	322	429	441	378
ame-mir-282*	186	83	119	202	169	167
ame-mir-283	315	985	382	630	965	598
ame-mir-2944	96	77	73	150	79	111
ame-mir-2944*	16	33	25	23	63	55
ame-mir-29b	19086	16818	13468	22990	14314	12707
ame-mir-3049	264	515	385	416	349	217
ame-mir-3049*	152	122	95	134	64	84
ame-mir-305	6723	6937	6844	7525	7264	5371
ame-mir-305*	2936	3114	2239	3446	2337	2287
ame-mir-306	2254	2487	2420	3717	2074	2016
ame-mir-306*	179	150	149	157	120	95
ame-mir-307	28290	29864	31650	40706	26941	29066
ame-mir-307*	54	39	64	73	59	67
ame-mir-316	4166	4239	3402	6000	2020	4141
ame-mir-316*	1883	1433	1283	1917	1120	1271
ame-mir-317	11398	9967	12418	7999	10855	7834
ame-mir-31a	2637	15700	8820	9376	6652	11519
ame-mir-33	3484	4499	3769	5257	3333	3059
ame-mir-33*	414	447	512	791	522	484
ame-mir-34	3510	1930	3462	3524	2617	2384
ame-mir-34*	512	544	549	626	429	421
ame-mir-3477	23	155	156	188	172	12
ame-mir-3715	178	175	134	218	137	82
ame-mir-3716b	230	196	149	253	154	117
ame-mir-3718a	14277	14572	12998	14461	9945	13226
ame-mir-3718a*	322	383	243	410	235	176
ame-mir-3720	30	25	42	82	53	35
ame-mir-3724	109	177	139	186	195	67
ame-mir-3727	35	34	27	37	17	33
ame-mir-3729	14	5	28	36	20	18
ame-mir-3732	1388	1200	1714	820	1286	921
ame-mir-3736	44	4	19	62	27	67
ame-mir-3737	1036	473	368	2384	314	344
ame-mir-3741	35	40	32	43	22	19
ame-mir-3743	40	53	59	44	16	21
ame-mir-3747a	60	108	46	73	22	20
ame-mir-3747a*	30	32	27	45	21	13
ame-mir-3747b	191	135	108	127	98	110
ame-mir-3749	268	314	359	239	213	250
ame-mir-375	2571	2410	1327	2731	2300	1879
ame-mir-375*	114	82	142	134	169	101
ame-mir-3750	66	123	66	54	36	98
ame-mir-3755	44	285	86	51	215	30
ame-mir-3756	168	147	91	164	102	121
ame-mir-3756*	82	98	46	98	45	57
ame-mir-3757	30	76	11	17	22	18
ame-mir-3759	51	18	36	85	27	24
ame-mir-3759*	28	10	19	38	18	16
ame-mir-3761	15871	21740	13467	20585	10271	7464
ame-mir-3767	345	226	295	160	115	68
ame-mir-3770	1092	1380	1404	1787	1280	1199
ame-mir-3770*	66	82	91	129	63	60
ame-mir-3772	168	160	159	247	113	101
ame-mir-3778	96	24	114	169	75	28
ame-mir-3782	25	27	36	16	22	22
ame-mir-3783	33	37	29	30	27	37
ame-mir-3784	61	118	31	75	25	23
ame-mir-3785	1134	1326	934	1728	1131	820
ame-mir-3785*	95	97	30	89	78	52
ame-mir-3786	295	257	208	456	239	273
ame-mir-3787	107	176	105	206	65	62
ame-mir-3788	162	84	147	187	110	116
ame-mir-3791	119	64	70	113	78	62
ame-mir-3792	886	1103	664	773	556	399
ame-mir-3798	14	148	164	5	176	61
ame-mir-7	817	820	664	935	744	491
ame-mir-7*	28	41	17	50	21	33
ame-mir-71	10608	14443	11862	11474	10779	8086
ame-mir-71*	5678	5891	5317	7127	4323	5452
ame-mir-750	609855	660162	488291	789303	359451	381384
ame-mir-750*	863	1235	952	1116	692	747
ame-mir-79	5809	6793	6139	7635	4505	4769
ame-mir-79*	3373	4290	3683	4366	3693	3462
ame-mir-8	59211	63512	65523	71140	52991	66471
ame-mir-8*	47863	44219	53402	66242	48252	48977
ame-mir-87-1	115828	142260	96133	143902	87135	86060
ame-mir-87-1*	24	37	22	20	15	27
ame-mir-87-2	115829	142252	96125	143900	87134	86052
ame-mir-87-2*	46	60	74	84	51	39
ame-mir-927	37	13	31	39	29	20
ame-mir-927*	34	12	18	34	23	10
ame-mir-92a	2890	2199	2796	3081	2017	2395
ame-mir-92b-1	7147	7571	6369	7724	4487	4640
ame-mir-92b-1*	34	47	29	44	17	16
ame-mir-92b-2	7147	7571	6368	7725	4487	4640
ame-mir-92b-2*	34	47	29	44	17	16
ame-mir-965	62	80	59	83	61	37
ame-mir-965*	27	32	29	56	27	25
ame-mir-971	43	37	40	62	56	49
ame-mir-971*	11	19	23	18	20	19
ame-mir-980	567	485	714	657	461	725
ame-mir-989	518	520	370	459	284	290
ame-mir-993	7153	9594	6995	9620	5063	4550
ame-mir-993*	1373	1725	1523	1983	1385	1192
ame-mir-996	519	249	616	732	532	312
ame-mir-996*	207	111	208	319	220	242
ame-mir-9a	12266	8643	8500	14230	9880	10096
ame-mir-9a*	3493	2608	3805	3555	3540	3241
ame-mir-9b	17	15	27	26	19	50
ame-mir-iab-4	4970	2324	6795	7243	5812	6902
TOTAL	2311480	2596144	2028493	2820235	1589716	1652395

## Sheet: sheet 6
DATA S1 microRNA data / sheet 6	Normalized, filtered (ie initial) Count Per Millions of the microRNAs belonging to all six libraries (Control and Experiment (IE)) for the second technical replicate (ie first sequencing)
	Transient exposure to low levels of insecticide affects metabolic network of honeybee larvae. Derecka et al. (2013)
miRNA	C1	C2	C3	IE1	IE2	IE3
ame-bantam	1966	2850	2984	3245	2694	2739
ame-bantam*	140	174	212	216	140	131
ame-let-7	681	843	935	836	801	741
ame-let-7*	139	174	131	163	82	81
ame-mir-1-1	37316	46200	37342	50636	29496	33123
ame-mir-1-1*	475	499	504	655	283	359
ame-mir-1-2	35892	45221	36757	49717	28863	32468
ame-mir-1-2*	474	493	500	653	282	358
ame-mir-10-1	1460	1606	1338	1826	1447	1110
ame-mir-10-1*	121	157	163	198	234	122
ame-mir-10-2	1432	1581	1327	1760	1432	1096
ame-mir-10-2*	119	157	165	200	232	121
ame-mir-100	6396	7240	6834	8286	4786	4678
ame-mir-100*	174	172	169	240	143	122
ame-mir-11	10146	11299	12025	14852	9699	10232
ame-mir-11*	212	232	231	238	185	149
ame-mir-1175	2692	2983	3024	3398	2490	3954
ame-mir-1175*	207	210	241	225	171	131
ame-mir-12	5717	7888	7480	10653	6227	5564
ame-mir-12*	15	28	21	29	18	12
ame-mir-124	169	233	176	140	237	166
ame-mir-124*	44	17	31	26	13	17
ame-mir-125	4652	4153	4753	5199	3102	3254
ame-mir-125*	10	27	28	32	21	30
ame-mir-133	353	261	354	347	291	468
ame-mir-133*	15	6	19	18	8	5
ame-mir-137	26	22	14	20	26	28
ame-mir-13a	252	418	365	434	340	354
ame-mir-13a*	198	182	176	289	190	172
ame-mir-13b	2808	2816	3699	4096	2429	2866
ame-mir-13b*	128	129	161	191	118	155
ame-mir-14	246014	312849	233323	271332	147544	133571
ame-mir-14*	507	677	540	614	274	308
ame-mir-184	25432	29195	29573	37970	12783	24974
ame-mir-184*	2223	2738	2163	3196	1385	1644
ame-mir-190	66	132	106	135	71	70
ame-mir-193	26	30	38	44	38	21
ame-mir-2-1	3704	4165	4461	5091	3728	3386
ame-mir-2-2	3704	4164	4461	5091	3727	3386
ame-mir-2-2*	19	24	19	25	18	21
ame-mir-2-3	3704	4164	4462	5090	3727	3656
ame-mir-210	43	34	39	38	44	58
ame-mir-210*	18	8	7	15	8	12
ame-mir-252	24065	34513	27344	40603	22520	23028
ame-mir-252*	111	92	84	115	79	65
ame-mir-263	1973	2467	2172	3070	1687	1397
ame-mir-263b	171	135	171	207	124	119
ame-mir-275	135	157	121	149	123	102
ame-mir-275*	28	87	45	56	100	60
ame-mir-276	10851	12763	12397	14095	11105	10700
ame-mir-276*	214	306	227	337	219	180
ame-mir-277	1205	1245	1473	1667	1454	1146
ame-mir-278	167	174	214	264	223	204
ame-mir-278*	45	28	16	47	28	27
ame-mir-2788	1356	1100	1176	1623	794	1007
ame-mir-2788*	25	39	40	47	41	9
ame-mir-279	60289	60165	59241	102941	50811	47470
ame-mir-279*	814	921	965	1229	873	651
ame-mir-2796	59	65	46	63	60	64
ame-mir-279b	28	18	34	44	23	19
ame-mir-279c	12722	15254	16801	14644	10636	15160
ame-mir-279c*	285	386	299	281	209	172
ame-mir-281	27045	33733	31495	37297	22013	24497
ame-mir-281*	85	106	120	153	117	122
ame-mir-282	102	131	134	184	206	203
ame-mir-282*	79	45	62	92	100	82
ame-mir-283	193	643	360	598	748	334
ame-mir-2944	40	25	38	75	30	24
ame-mir-29b	7190	7484	6338	10616	6418	5642
ame-mir-3049	184	253	196	207	154	127
ame-mir-3049*	64	52	64	69	33	65
ame-mir-305	2951	3367	3503	3890	3154	2594
ame-mir-305*	1456	1710	1075	1925	1149	995
ame-mir-306	1051	1250	1117	1842	1050	1004
ame-mir-306*	68	79	66	75	48	62
ame-mir-307	13048	14354	15995	19674	12317	14210
ame-mir-307*	19	18	29	30	39	36
ame-mir-316	2104	2165	1799	3110	1752	1845
ame-mir-316*	1283	1117	983	1478	691	847
ame-mir-317	6278	5299	6979	5701	6002	4397
ame-mir-31a	2167	9418	5912	5441	5845	6572
ame-mir-33	1458	1952	1787	2689	1464	1432
ame-mir-33*	212	265	286	413	261	227
ame-mir-34	1778	1766	1921	1999	1579	1275
ame-mir-34*	253	280	283	288	194	184
ame-mir-3477	49	70	84	92	89	14
ame-mir-3715	91	84	80	95	60	33
ame-mir-3716b	441	277	257	375	338	76
ame-mir-3718a	6937	6254	6456	7004	4095	5929
ame-mir-3718a*	128	199	164	227	112	88
ame-mir-3720	18	11	18	55	31	22
ame-mir-3722	14	11	18	14	10	5
ame-mir-3724	266	199	207	268	249	56
ame-mir-3726	13	11	20	17	6	18
ame-mir-3727	23	22	16	19	6	21
ame-mir-3732	715	683	905	577	609	458
ame-mir-3737	631	269	327	1641	251	180
ame-mir-3741	13	14	17	28	14	15
ame-mir-3743	28	17	17	16	10	14
ame-mir-3747a	23	60	29	41	20	8
ame-mir-3747a*	11	22	20	35	9	7
ame-mir-3747b	88	68	79	57	33	45
ame-mir-3749	146	267	242	183	239	110
ame-mir-375	1312	1267	970	1519	1154	981
ame-mir-375*	71	34	78	0	75	46
ame-mir-3750	8	48	31	9	26	12
ame-mir-3756	54	69	56	87	45	74
ame-mir-3756*	27	35	30	49	28	41
ame-mir-3759	20	15	22	48	16	8
ame-mir-3759*	15	9	12	17	6	6
ame-mir-3761	8043	11722	7967	11229	4893	4022
ame-mir-3767	171	117	179	109	76	32
ame-mir-3770	524	613	698	961	622	565
ame-mir-3770*	28	45	45	64	50	34
ame-mir-3772	55	64	60	87	49	52
ame-mir-3778	19	4	23	36	16	6
ame-mir-3782	17	18	12	14	14	14
ame-mir-3783	11	9	16	23	20	22
ame-mir-3783*	7	0	0	16	9	9
ame-mir-3784	35	29	2	37	4	2
ame-mir-3785	527	643	456	886	545	408
ame-mir-3785*	40	44	42	56	37	24
ame-mir-3786	148	107	115	221	118	123
ame-mir-3786*	15	27	35	29	10	10
ame-mir-3787	369	325	264	402	191	190
ame-mir-3788	37	48	31	51	46	34
ame-mir-3791	48	36	38	59	40	49
ame-mir-3792	359	341	293	322	220	153
ame-mir-3798	10	100	99	2	109	28
ame-mir-3799	27	1	12	32	7	1
ame-mir-7	350	410	390	488	385	239
ame-mir-7*	10	24	6	19	8	11
ame-mir-71	4422	6842	6168	5844	4980	3888
ame-mir-71*	2414	2797	2657	3393	1961	2610
ame-mir-750	272378	298001	232252	363945	159261	175016
ame-mir-750*	344	622	504	617	333	341
ame-mir-79	2194	3229	3108	3728	2171	2313
ame-mir-79*	1308	2322	2070	2652	1963	1671
ame-mir-8	28594	28885	32241	36507	29249	33518
ame-mir-8*	17191	25124	29843	33824	21030	22927
ame-mir-87-1	56383	70276	52335	73738	40371	42044
ame-mir-87-1*	12	16	9	16	12	10
ame-mir-87-2	56383	70274	52335	73740	40371	42044
ame-mir-87-2*	30	35	33	49	22	22
ame-mir-927	14	18	13	34	20	17
ame-mir-92a	1345	1145	1378	1434	920	1069
ame-mir-92a*	13	8	5	8	10	39
ame-mir-92b-1	3644	3452	3222	3780	2082	2265
ame-mir-92b-1*	16	18	15	19	14	16
ame-mir-92b-2	3641	3452	3222	3780	2083	2265
ame-mir-92b-2*	16	17	15	19	15	16
ame-mir-965	29	49	30	41	31	30
ame-mir-965*	9	20	12	29	18	23
ame-mir-971	17	14	13	39	17	30
ame-mir-980	306	287	298	305	257	353
ame-mir-989	261	241	199	234	126	107
ame-mir-993	3333	4553	3343	4942	2331	2086
ame-mir-993*	776	787	747	957	544	537
ame-mir-996	320	180	341	404	268	192
ame-mir-996*	94	115	118	179	83	127
ame-mir-9a	5313	6096	5556	8440	5773	5251
ame-mir-9a*	1162	1963	2065	2245	1850	1563
ame-mir-9c	5	18	7	22	13	8
ame-mir-iab-4	1852	2370	3266	3578	2856	3292
TOTAL	1069351	1269846	1063117	1422945	772335	804254

## Sheet: PLOTS
Data S1 microRNA data / sheet 7	[A] Biological Coefficient of Variation (BCV) plot of all twelve samples (three merged controls and three merged samples). X axis => log Count Per Millions (the sequence coverage depth in log2 scale). Y-axis => Biological coefficient of variation (right) MDS Dispersion value is 0.057, while common BCV was estimated at 0.24 [B] Multidimensional scaling plot of the same comparisons in A. The distan…
	Transient exposure to low levels of insecticide affects metabolic network of honeybee larvae. Derecka et al. (2013)
A							B													C
	Disp = 0.05671 , BCV = 0.2381
