# Supplementary material for: Transient Exposure to Low Levels of Insecticide Affects Metabolic Networks of Honeybee Larvae
Source: PLOS journal article supplement (doi:10.1371/journal.pone.0068191), 2013-07-02
Supplement: S2 (10.1371/journal.pone.0068191.s002) [file journal.pone.0068191.s002]

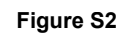

Shown is a map of known and predicted interactions of gene-products from our list of 195 down-regulated mRNAs in the 'IE' data set. The analysis reveals strong links between the down regulation of genes involved in sugar metabolism and translation in both the cell and the mitochondria.

*Transient exposure to low levels of insecticide affects metabolic network of honeybee larvae. Derecka et al. 2013*
