# Supplementary material for: Transient Exposure to Low Levels of Insecticide Affects Metabolic Networks of Honeybee Larvae
Source: PLOS journal article supplement (doi:10.1371/journal.pone.0068191), 2013-07-02
Supplement: S7 (10.1371/journal.pone.0068191.s007) [file journal.pone.0068191.s007]

TABLE S5

## Larval weights

*Transient exposure to low levels of insecticide affects metabolic network of honeybee larvae.*

*Derecka et al. (2013)*

Individual worker-bee larvae from each hive were weighed and numbered. The IDs of larvae used for RNA-Seq ( micro RNA and whole transcriptome ) are indicated (red numbers). Larvae had been collected in the field and stored in ice-cold RNAlater solution and were subsequently stored at -80oC. Weighing of larvae took place after thawing the RNAlater solution, while larvae were still in a semi-frozen state. Thus, the recorded weights do not capture with 100% accuracy the actual weights of larvae. Small droplets or crystals of RNAlater solution are likely to have been contributing factors to the measurements of some larvae.

| larval weight<br>(mg) | hives     |                     |            | hives              |                |       |
|-----------------------|-----------|---------------------|------------|--------------------|----------------|-------|
|                       | IE1       | IE2                 | IE3        | C1                 | C2             | C3    |
| 34                    |           |                     |            |                    |                | 77    |
| 50                    | 18,19,20  |                     |            |                    | 78,79,80,81,82 |       |
| 60                    | 1         |                     | 38, 39, 40 | 51, 52, 53, 54, 55 |                |       |
| 65                    |           |                     |            |                    |                | 83    |
| 70                    | 2,3,4,    | 21                  | 41,42,43   | 56                 | 63,64          | 84    |
| 75                    | 5,6       |                     |            |                    | 65,66          |       |
| 80                    | 7,8,9,10, | 22, 23, 24, 25, 26, |            |                    | 67,68          | 85    |
| 90                    | 11        | 27,28,29,30         |            | 57,58              | 69,70,71       |       |
| 100                   | 12        | 31,32               | 44,45      |                    | 72,73,74,75    | 86,87 |
| 120                   | 13,14,    | 33, 34,35, 36, 37   | 46         | 61,62              | 76             |       |
| 140                   | 15,26     |                     |            | 59,60              |                |       |
| 150                   |           |                     |            |                    |                |       |
| 190                   | 47        |                     |            |                    |                |       |
